# Supplementary material
Source: PubMed Central journal article supplement (PMC4174941)
Supplement: 2ce51bae6ad6e3c4a69b4b9b146e959a_genetics.114.161943-14.pdf [file 2ce51bae6ad6e3c4a69b4b9b146e959a_genetics.114.161943-14.pdf]

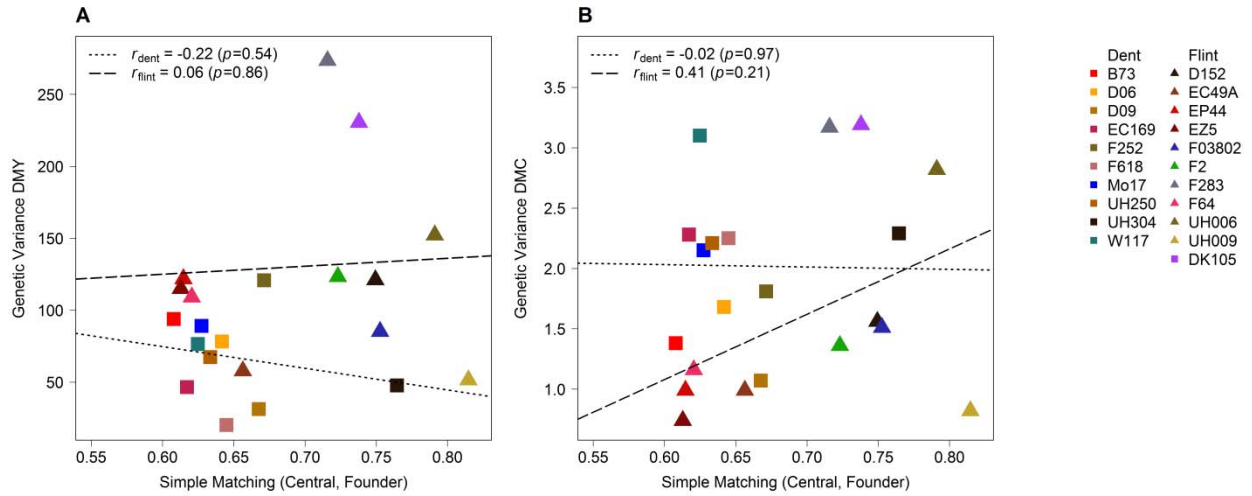

**Figure S9** Genetic variance within biparental families compared to simple matching coefficient between central and founder line. A) Dry matter yield (DMY). B) Dry matter content (DMC).
