# Supplementary material
Source: PubMed Central journal article supplement (PMC4174941)
Supplement: 5c6f8ac96005fc6b681af7337014eda9_genetics.114.161943-7.pdf [file 5c6f8ac96005fc6b681af7337014eda9_genetics.114.161943-7.pdf]

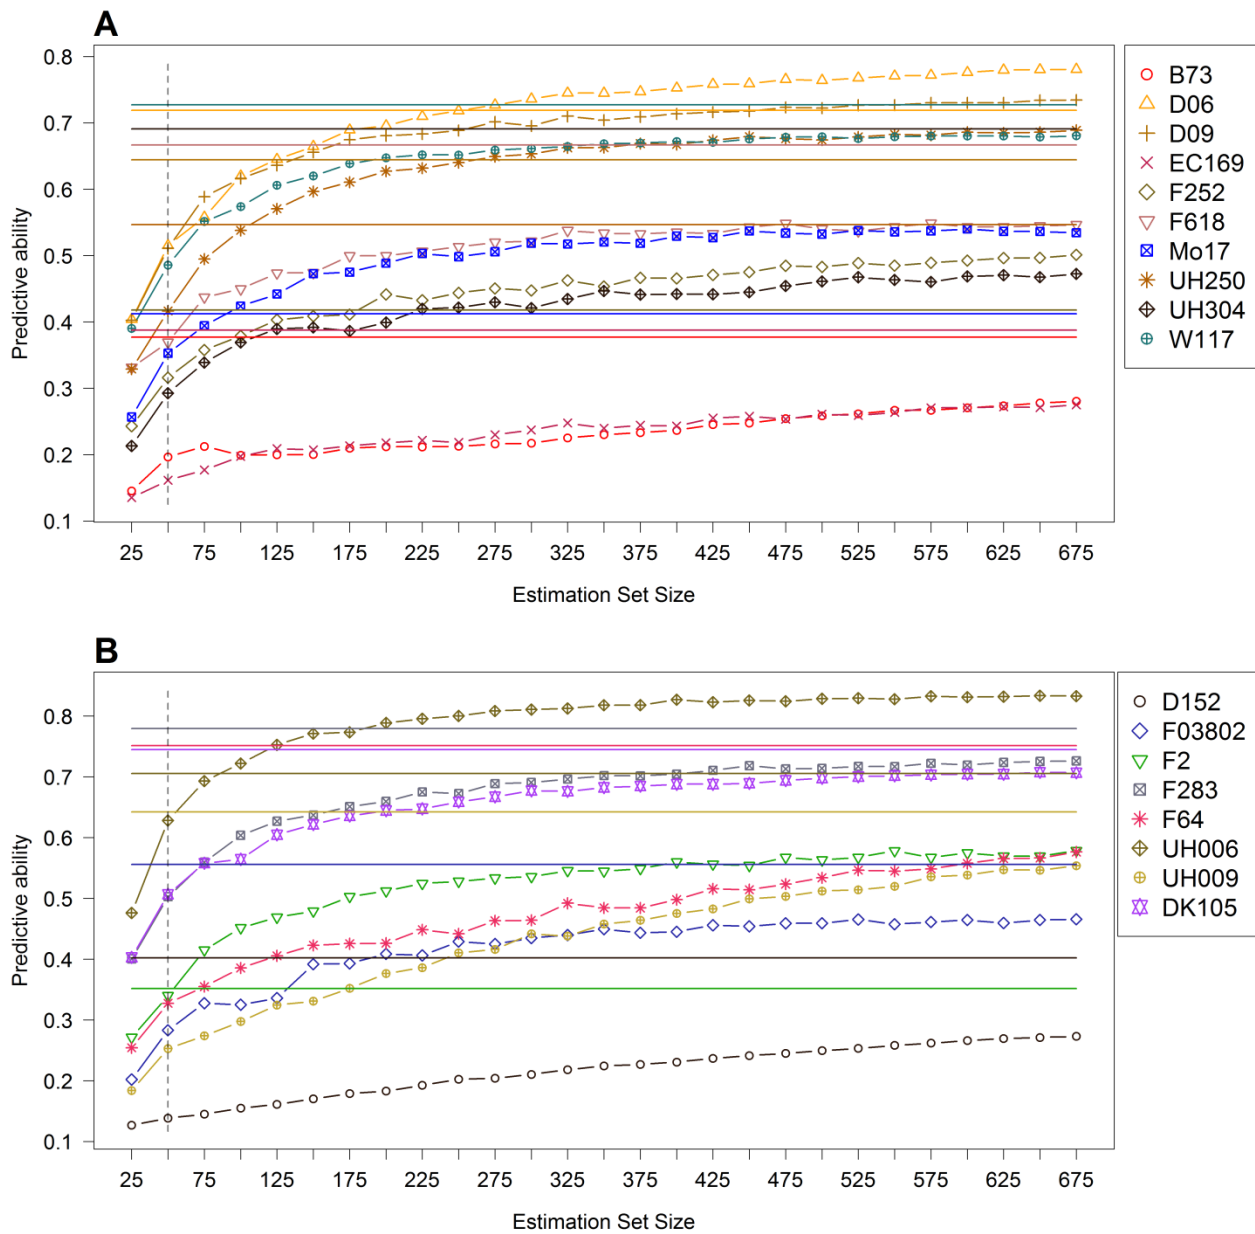

**Figure S6** Mean predictive ability of days to silking (DtSILK) from LOCO-CV for increasing estimation set size. Mean predictive ability from prediction within biparental families is shown by different colored horizontal lines. A) Dent. B) Flint. The dashed vertical lines label predictive abilities at an estimation set size of 50.
