# Supplementary material
Source: PubMed Central journal article supplement (PMC4174941)
Supplement: 8f056587b2ba619f827e139c433fd91c_genetics.114.161943-18.pdf [file 8f056587b2ba619f827e139c433fd91c_genetics.114.161943-18.pdf]

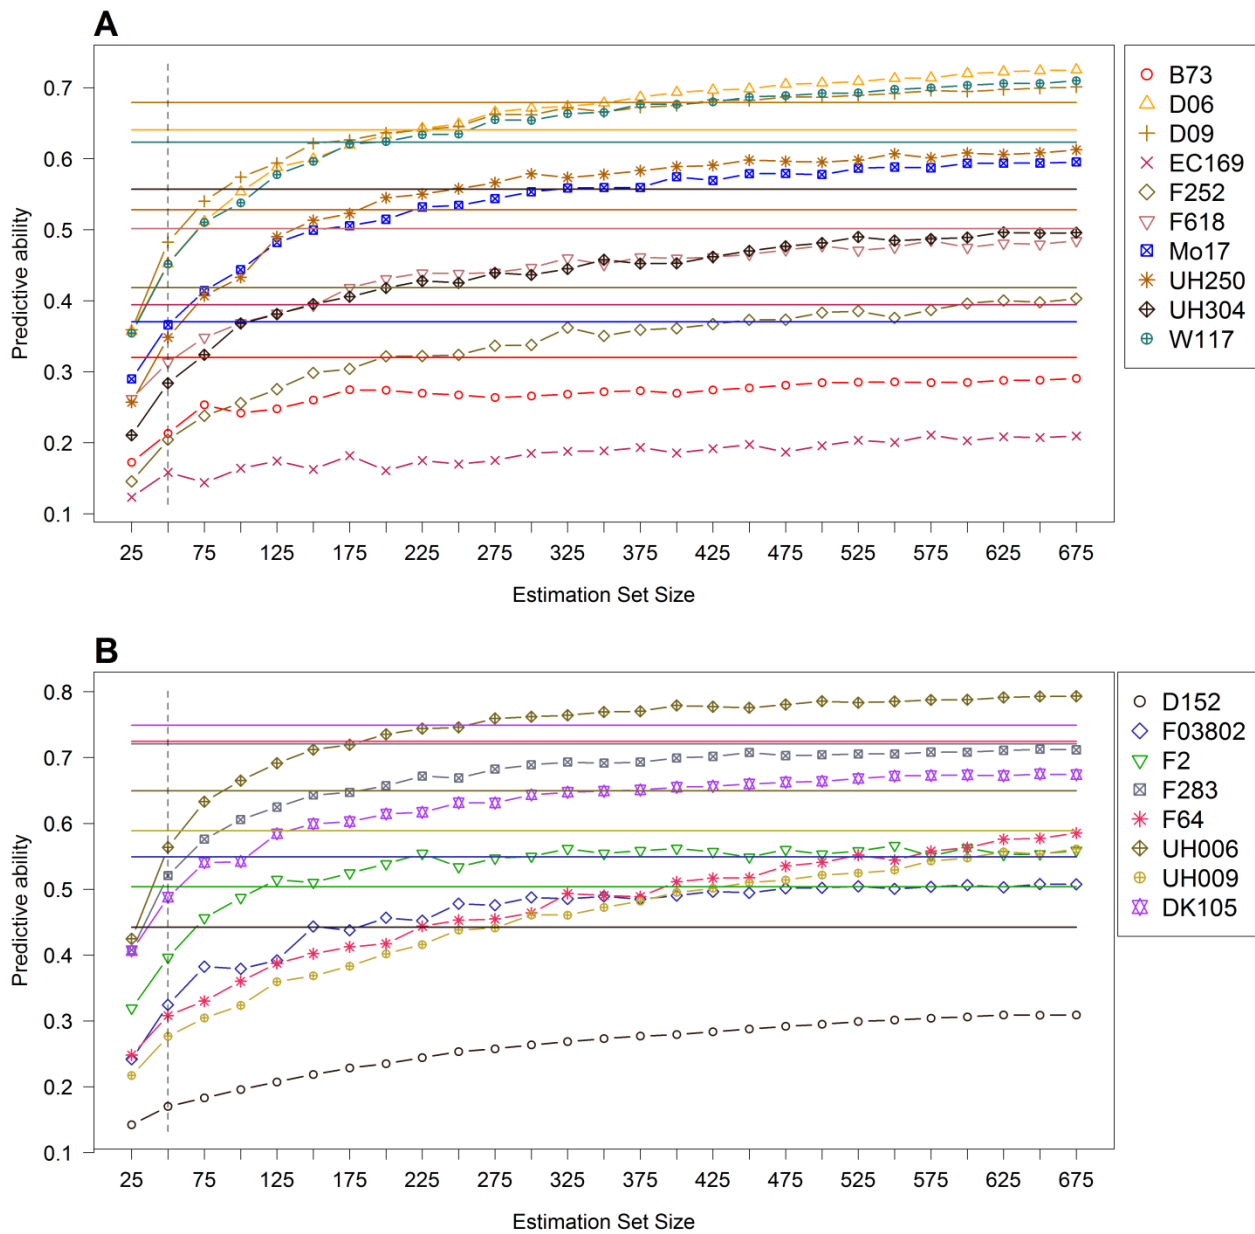

**Figure S5** Mean predictive ability of days to tasseling (DtTAS) from LOCO-CV for increasing estimation set size. Mean predictive ability from prediction within biparental families is shown by different colored horizontal lines. A) Dent. B) Flint. The dashed vertical lines label predictive abilities at an estimation set size of 50.
