# Supplementary material
Source: PubMed Central journal article supplement (PMC4174941)
Supplement: 20bd56c52bf2d44af66c3dcf10dc64d6_genetics.114.161943-8.pdf [file 20bd56c52bf2d44af66c3dcf10dc64d6_genetics.114.161943-8.pdf]

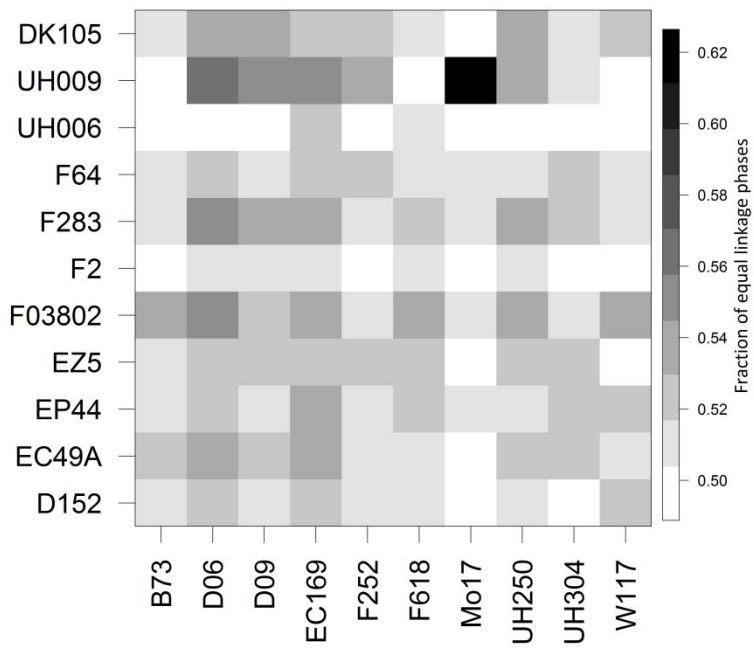

**Figure S13** Heatmap showing the fraction of equal linkage phases of 5-10 Mb distant SNP pairs among dent and flint families.
