# Supplementary material
Source: PubMed Central journal article supplement (PMC4174941)
Supplement: 20eb2aee9f301b9d9993b7ffb7effd9b_genetics.114.161943-3.pdf [file 20eb2aee9f301b9d9993b7ffb7effd9b_genetics.114.161943-3.pdf]

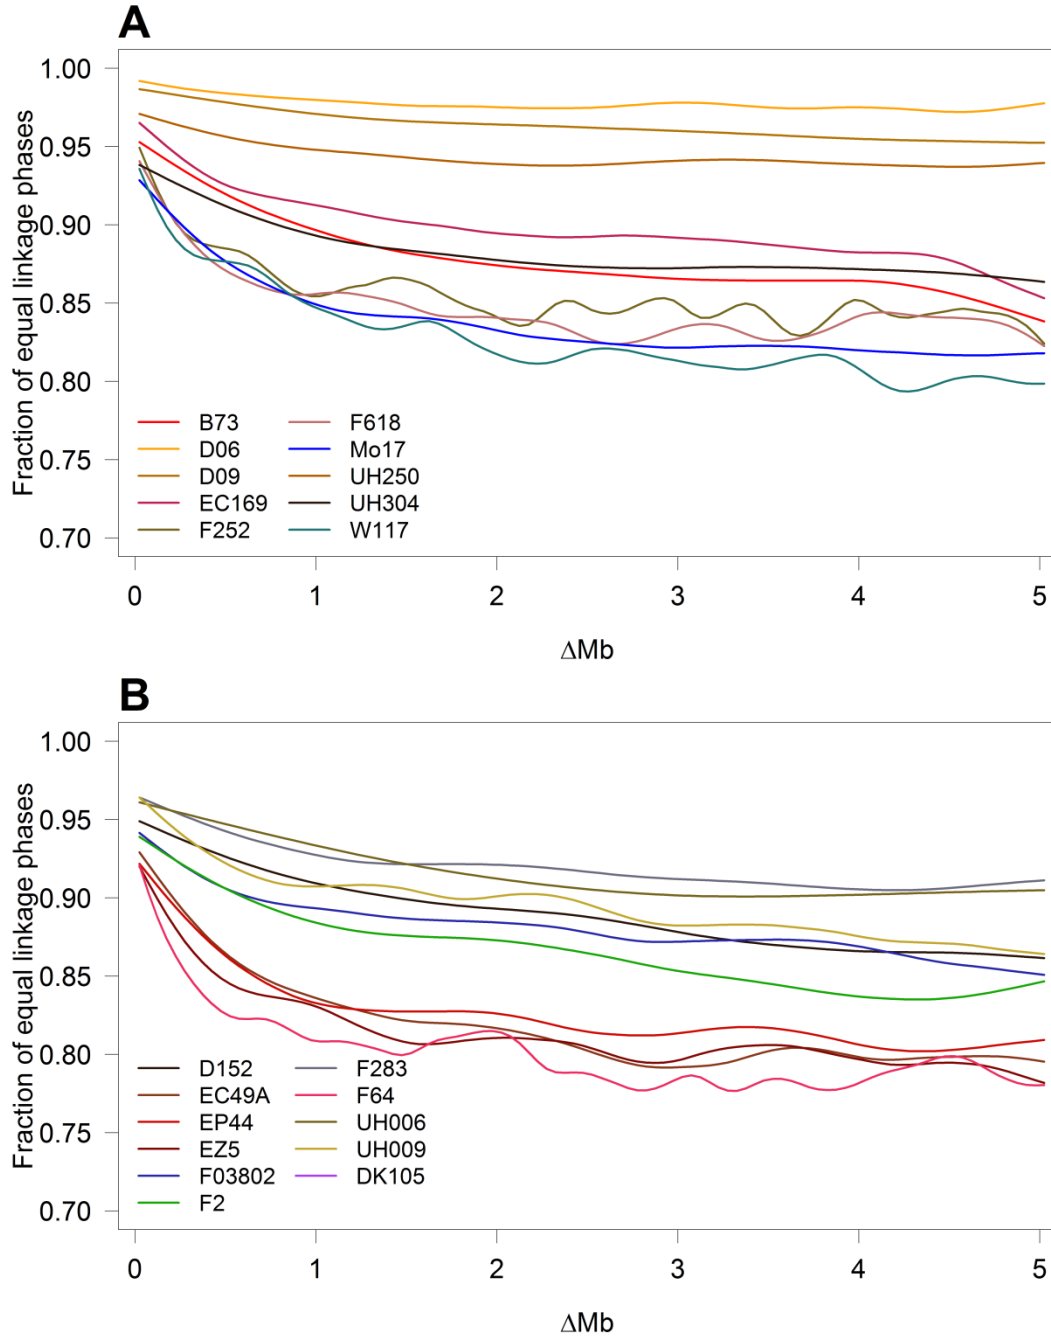

**Figure S8** Fraction of equal linkage phases according to distance between SNP pairs in mega basepairs ( $\Delta$  Mb). A: Each line shows the comparison of one dent family with the other 9 dent families. B: Each line shows the comparison of one flint family with the other 10 flint families.
