# Supplementary material
Source: PubMed Central journal article supplement (PMC4174941)
Supplement: 33cd97214fe422b442bbb936915a7d32_genetics.114.161943-5.pdf [file 33cd97214fe422b442bbb936915a7d32_genetics.114.161943-5.pdf]

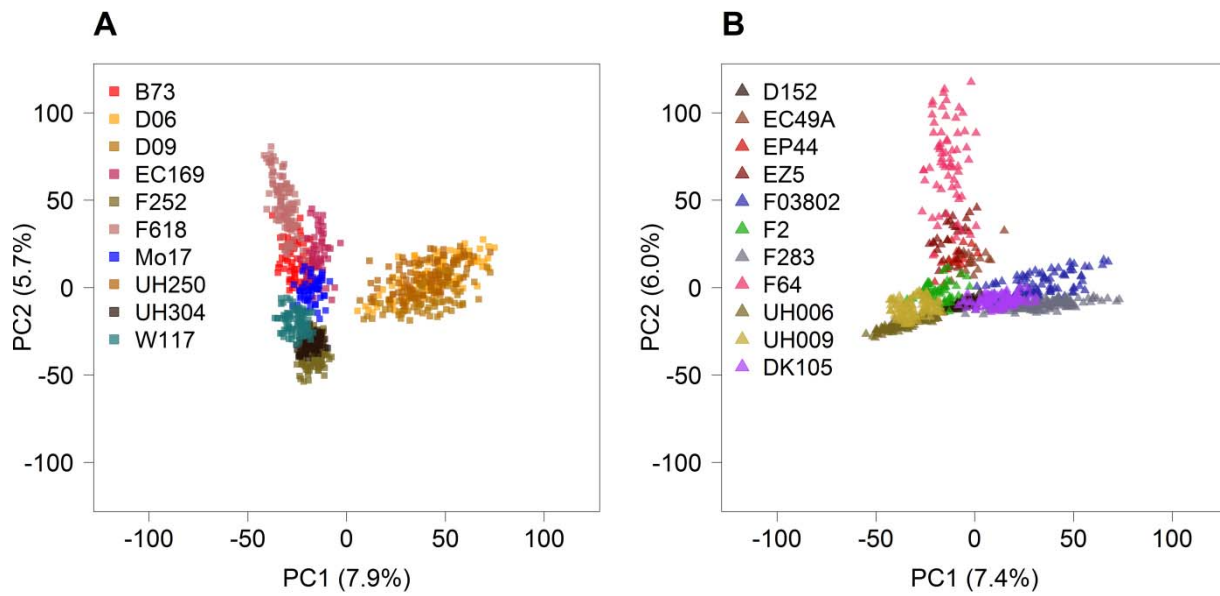

**Figure S1** Principal component analysis of dent and flint lines. First and second principal component of dent lines (A) and of flint lines (B). Colors indicate DH lines belonging to different full-sib families.
