# Supplementary material
Source: PubMed Central journal article supplement (PMC4174941)
Supplement: 40ce2bce1d51f13686e218c8c55b10aa_genetics.114.161943-13.pdf [file 40ce2bce1d51f13686e218c8c55b10aa_genetics.114.161943-13.pdf]

**Table S2 Total number of lines (n) and simple matching coefficient (SM) between parental lines of 10 dent (F353 x founder) and 11 flint (UH007 x founder) families. Mean ( $\bar{x}$ ), genetic variance component ( $\sigma_g^2$ ), genotype by environment variance component ( $\sigma_{ge}^2$ ), and heritability ( $h^2$ ;  $\pm$  standard error) of dent and flint families estimated for days to tasseling (DtTAS).**

| Founder | n   | SM    | $\bar{x}$        | $\sigma_g^2$    | $\sigma_{ge}^2$ | $h^2$           |
|---------|-----|-------|------------------|-----------------|-----------------|-----------------|
| B73     | 64  | 0.608 | 83.61 $\pm$ 0.16 | 0.78 $\pm$ 0.31 | 2.23 $\pm$ 0.39 | 0.50 $\pm$ 0.11 |
| D06     | 99  | 0.642 | 81.39 $\pm$ 0.13 | 1.07 $\pm$ 0.23 | 0.96 $\pm$ 0.2  | 0.71 $\pm$ 0.05 |
| D09     | 100 | 0.668 | 80.52 $\pm$ 0.15 | 1.54 $\pm$ 0.31 | 1.62 $\pm$ 0.24 | 0.73 $\pm$ 0.05 |
| EC169   | 66  | 0.617 | 81.66 $\pm$ 0.12 | 0.68 $\pm$ 0.18 | 0.23 $\pm$ 0.21 | 0.71 $\pm$ 0.07 |
| F252    | 96  | 0.671 | 80.12 $\pm$ 0.13 | 0.90 $\pm$ 0.24 | 2.00 $\pm$ 0.27 | 0.58 $\pm$ 0.08 |
| F618    | 104 | 0.645 | 83.81 $\pm$ 0.14 | 1.12 $\pm$ 0.27 | 1.65 $\pm$ 0.32 | 0.62 $\pm$ 0.07 |
| Mo17    | 53  | 0.627 | 84.63 $\pm$ 0.25 | 2.44 $\pm$ 0.67 | 1.45 $\pm$ 0.60 | 0.74 $\pm$ 0.07 |
| UH250   | 94  | 0.634 | 82.07 $\pm$ 0.13 | 1.12 $\pm$ 0.24 | 0.85 $\pm$ 0.25 | 0.71 $\pm$ 0.06 |
| UH304   | 81  | 0.765 | 81.70 $\pm$ 0.12 | 0.72 $\pm$ 0.18 | 0.65 $\pm$ 0.21 | 0.67 $\pm$ 0.07 |
| W117    | 84  | 0.625 | 80.69 $\pm$ 0.14 | 1.04 $\pm$ 0.25 | 0.82 $\pm$ 0.26 | 0.70 $\pm$ 0.06 |
| D152    | 72  | 0.749 | 79.63 $\pm$ 0.13 | 0.81 $\pm$ 0.21 | 1.22 $\pm$ 0.23 | 0.68 $\pm$ 0.06 |
| EC49A   | 29  | 0.656 | 82.39 $\pm$ 0.24 | 1.17 $\pm$ 0.47 | 1.89 $\pm$ 0.47 | 0.70 $\pm$ 0.09 |
| EP44    | 17  | 0.615 | 84.85 $\pm$ 0.51 | 3.74 $\pm$ 1.55 | 1.23 $\pm$ 0.79 | 0.87 $\pm$ 0.06 |
| EZ5     | 26  | 0.613 | 84.26 $\pm$ 0.41 | 3.80 $\pm$ 1.24 | 2.02 $\pm$ 0.50 | 0.88 $\pm$ 0.04 |
| F03802  | 129 | 0.753 | 81.08 $\pm$ 0.12 | 1.52 $\pm$ 0.24 | 1.16 $\pm$ 0.18 | 0.81 $\pm$ 0.03 |
| F2      | 54  | 0.723 | 79.45 $\pm$ 0.20 | 1.62 $\pm$ 0.41 | 1.37 $\pm$ 0.28 | 0.80 $\pm$ 0.05 |
| F283    | 133 | 0.716 | 81.15 $\pm$ 0.18 | 3.96 $\pm$ 0.55 | 1.14 $\pm$ 0.22 | 0.90 $\pm$ 0.01 |
| F64     | 64  | 0.621 | 84.72 $\pm$ 0.27 | 4.14 $\pm$ 0.85 | 1.30 $\pm$ 0.42 | 0.88 $\pm$ 0.03 |
| UH006   | 94  | 0.791 | 80.17 $\pm$ 0.15 | 1.79 $\pm$ 0.33 | 1.09 $\pm$ 0.22 | 0.83 $\pm$ 0.03 |
| UH009   | 98  | 0.815 | 80.10 $\pm$ 0.12 | 1.07 $\pm$ 0.20 | 0.84 $\pm$ 0.17 | 0.79 $\pm$ 0.04 |
| DK105   | 95  | 0.738 | 81.15 $\pm$ 0.23 | 4.55 $\pm$ 0.74 | 1.04 $\pm$ 0.27 | 0.91 $\pm$ 0.02 |
