# Supplementary material
Source: PubMed Central journal article supplement (PMC4174941)
Supplement: 167e264977f00c29bd89ef74c6b3debd_genetics.114.161943-19.pdf [file 167e264977f00c29bd89ef74c6b3debd_genetics.114.161943-19.pdf]

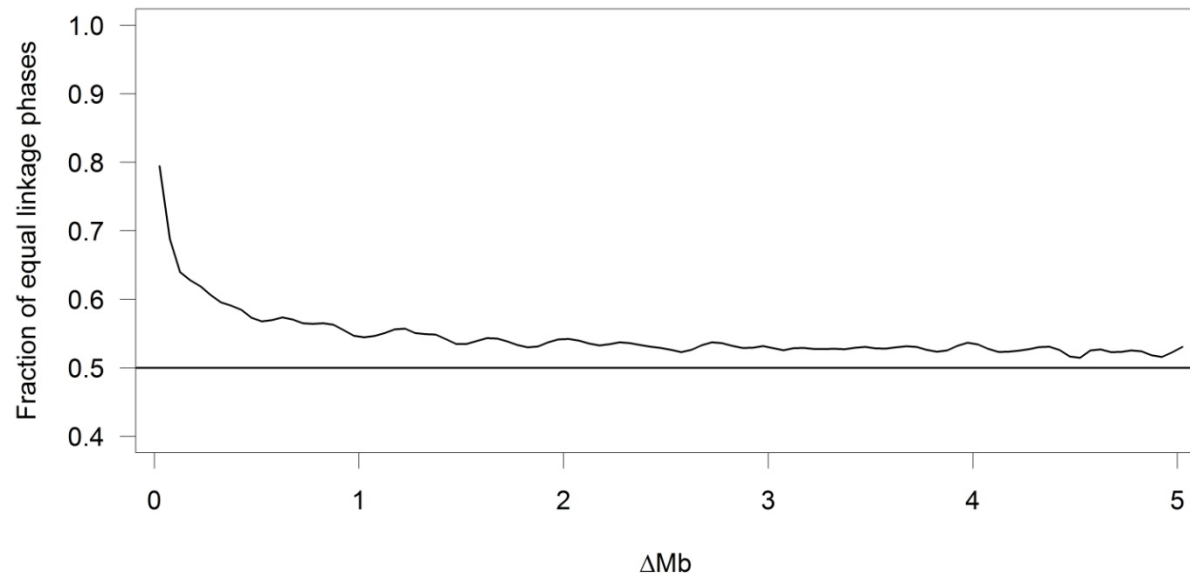

**Figure S12** Fraction of equal linkage phases among dent and flint lines according to distance between SNP pairs in mega basepairs ( $\Delta Mb$ ).
