# Supplementary material
Source: PubMed Central journal article supplement (PMC4174941)
Supplement: 596a17ca384c4a18530d63a5df3d10a9_genetics.114.161943-11.pdf [file 596a17ca384c4a18530d63a5df3d10a9_genetics.114.161943-11.pdf]

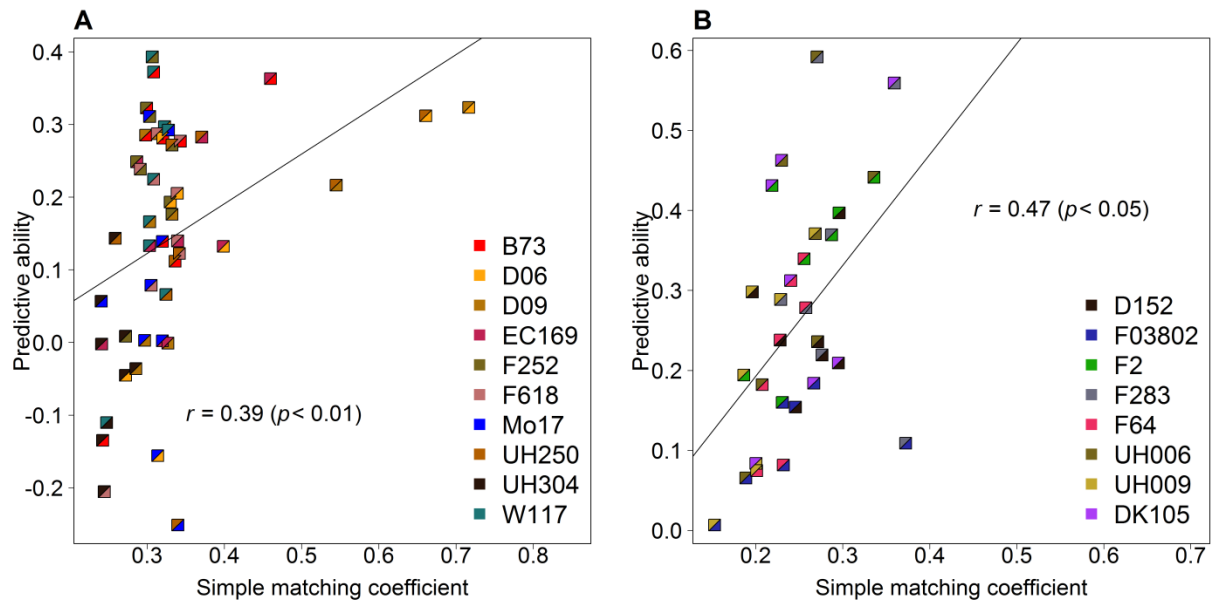

**Figure S11** Predictive ability of dry matter yield (DMY) from cross-with-cross prediction (CwC) averaged over both reciprocal estimations compared to simple matching coefficient between founder lines of crosses. Colors indicate the founder line of the family in the estimation and test set, respectively. A) Dent. B) Flint.
