# Supplementary material
Source: PubMed Central journal article supplement (PMC4174941)
Supplement: 684f5c96b9dd44dbe46721859b02e689_genetics.114.161943-15.pdf [file 684f5c96b9dd44dbe46721859b02e689_genetics.114.161943-15.pdf]

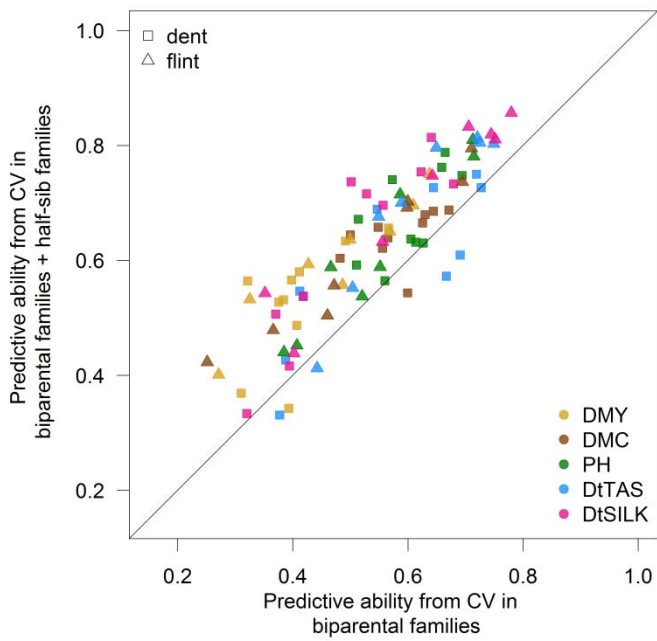

**Figure S7** Mean predictive abilities from cross-validation within biparental families (R-CV) for all five traits compared to mean predictive abilities when additionally families of the same heterotic pool (all half-sib families) were included in the estimation set. Colors indicate different traits.
