# Supplementary material
Source: PubMed Central journal article supplement (PMC4174941)
Supplement: a29aab3bccd818123338aad08c03fe6c_genetics.114.161943-2.pdf [file a29aab3bccd818123338aad08c03fe6c_genetics.114.161943-2.pdf]

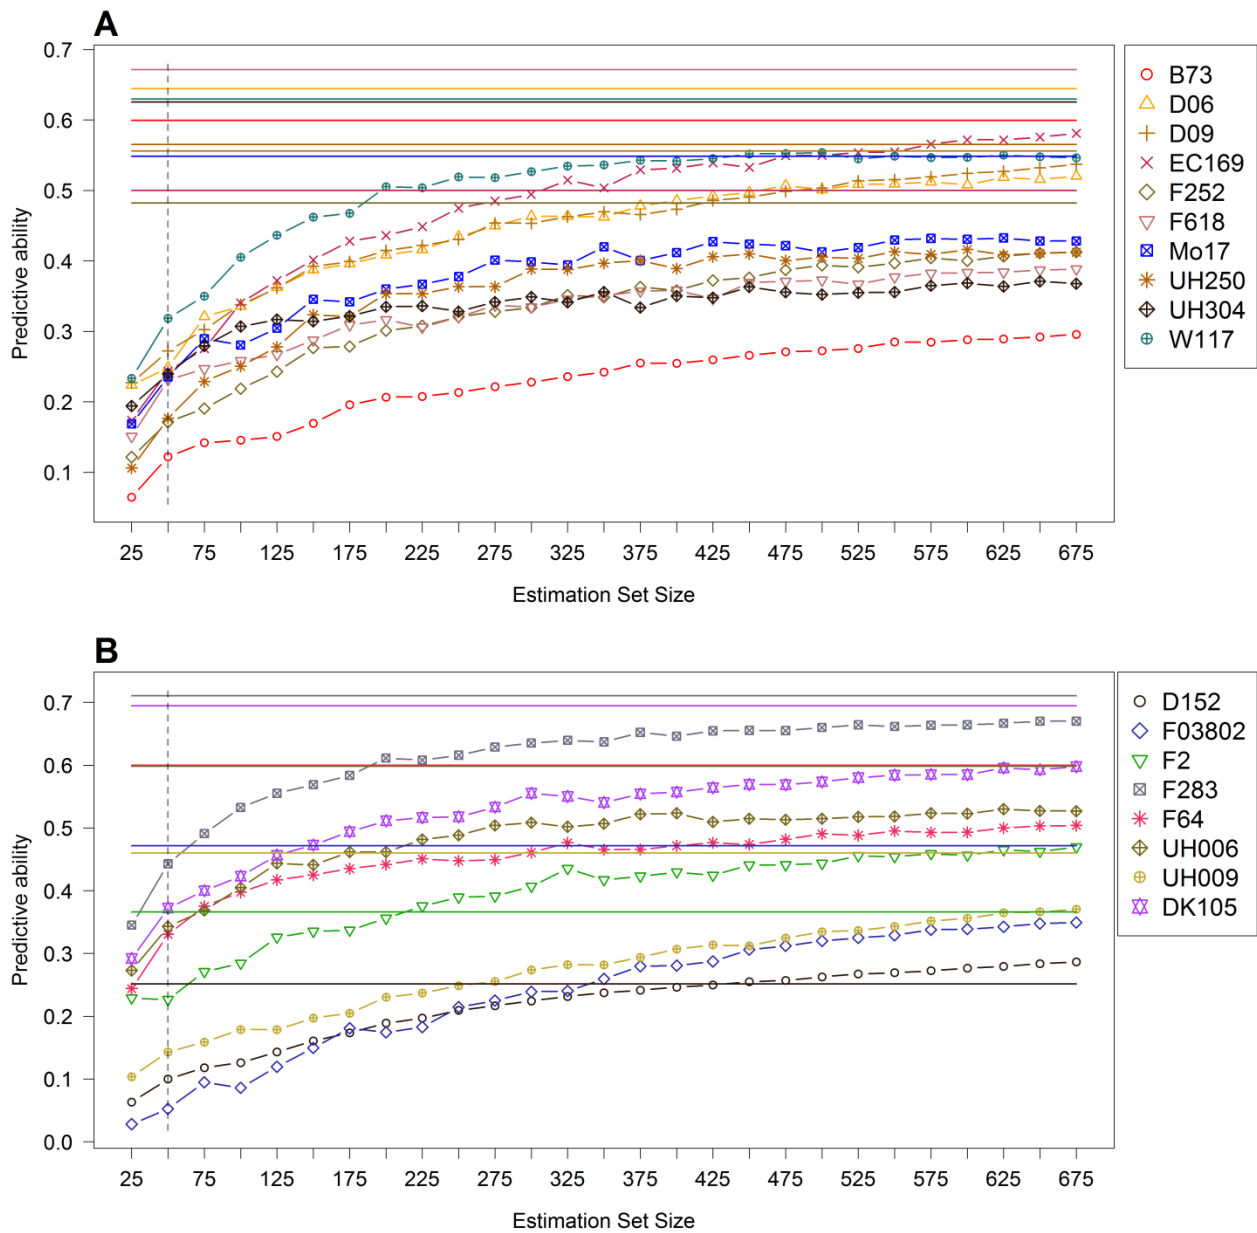

**Figure S3** Mean predictive ability of dry matter content (DMC) from LOCO-CV for increasing estimation set size. Mean predictive ability from prediction within biparental families is shown by different colored horizontal lines. A) Dent. B) Flint. The dashed vertical lines label predictive abilities at an estimation set size of 50.
