# Supplementary material
Source: PubMed Central journal article supplement (PMC4174941)
Supplement: ac3a47f488540575b11d323c52551fbd_genetics.114.161943-1.pdf [file ac3a47f488540575b11d323c52551fbd_genetics.114.161943-1.pdf]

**Table S3 Total number of lines (n) and simple matching coefficient (SM) between parental lines of 10 dent (F353 x founder) and 11 flint (UH007 x founder) families. Mean ( $\bar{x}$ ), genetic variance component ( $\sigma_g^2$ ), genotype by environment variance component ( $\sigma_{ge}^2$ ), and heritability ( $h^2$ ;  $\pm$  standard error) of dent and flint families estimated for days to silking (DtSILK).**

| Founder | n   | SM    | $\bar{x}$        | $\sigma_g^2$    | $\sigma_{ge}^2$ | $h^2$           |
|---------|-----|-------|------------------|-----------------|-----------------|-----------------|
| B73     | 64  | 0.608 | 85.59 $\pm$ 0.20 | 1.57 $\pm$ 0.43 | 1.66 $\pm$ 0.39 | 0.70 $\pm$ 0.07 |
| D06     | 99  | 0.642 | 82.85 $\pm$ 0.18 | 2.72 $\pm$ 0.47 | 0.95 $\pm$ 0.24 | 0.85 $\pm$ 0.03 |
| D09     | 100 | 0.668 | 81.93 $\pm$ 0.21 | 3.74 $\pm$ 0.61 | 0               | 0.89 $\pm$ 0.02 |
| EC169   | 66  | 0.617 | 83.02 $\pm$ 0.14 | 0.95 $\pm$ 0.24 | 0.44 $\pm$ 0.23 | 0.75 $\pm$ 0.06 |
| F252    | 96  | 0.671 | 81.41 $\pm$ 0.18 | 2.38 $\pm$ 0.44 | 0.87 $\pm$ 0.32 | 0.80 $\pm$ 0.04 |
| F618    | 104 | 0.645 | 85.57 $\pm$ 0.19 | 2.91 $\pm$ 0.52 | 0.97 $\pm$ 0.35 | 0.82 $\pm$ 0.03 |
| Mo17    | 53  | 0.627 | 87.3 $\pm$ 0.33  | 4.93 $\pm$ 1.11 | 1.09 $\pm$ 0.43 | 0.89 $\pm$ 0.03 |
| UH250   | 94  | 0.634 | 83.54 $\pm$ 0.18 | 2.71 $\pm$ 0.48 | 1.05 $\pm$ 0.24 | 0.85 $\pm$ 0.03 |
| UH304   | 81  | 0.765 | 82.70 $\pm$ 0.16 | 1.59 $\pm$ 0.33 | 0.83 $\pm$ 0.24 | 0.79 $\pm$ 0.04 |
| W117    | 84  | 0.625 | 82.30 $\pm$ 0.23 | 3.59 $\pm$ 0.68 | 0.92 $\pm$ 0.40 | 0.85 $\pm$ 0.03 |
| D152    | 72  | 0.749 | 82.88 $\pm$ 0.15 | 1.23 $\pm$ 0.26 | 0.67 $\pm$ 0.20 | 0.81 $\pm$ 0.04 |
| EC49A   | 29  | 0.656 | 85.89 $\pm$ 0.30 | 2.21 $\pm$ 0.69 | 0.60 $\pm$ 0.38 | 0.87 $\pm$ 0.04 |
| EP44    | 17  | 0.615 | 88.41 $\pm$ 0.52 | 4.14 $\pm$ 1.66 | 1.93 $\pm$ 0.57 | 0.89 $\pm$ 0.04 |
| EZ5     | 26  | 0.613 | 88.05 $\pm$ 0.36 | 2.92 $\pm$ 0.97 | 1.69 $\pm$ 0.43 | 0.86 $\pm$ 0.04 |
| F03802  | 129 | 0.753 | 84.31 $\pm$ 0.14 | 2.12 $\pm$ 0.30 | 0.46 $\pm$ 0.15 | 0.89 $\pm$ 0.02 |
| F2      | 54  | 0.723 | 82.25 $\pm$ 0.18 | 1.39 $\pm$ 0.34 | 1.38 $\pm$ 0.21 | 0.81 $\pm$ 0.04 |
| F283    | 133 | 0.716 | 84.67 $\pm$ 0.23 | 6.46 $\pm$ 0.84 | 0.93 $\pm$ 0.17 | 0.95 $\pm$ 0.01 |
| F64     | 64  | 0.621 | 88.41 $\pm$ 0.27 | 3.91 $\pm$ 0.81 | 2.00 $\pm$ 0.36 | 0.87 $\pm$ 0.03 |
| UH006   | 94  | 0.791 | 83.16 $\pm$ 0.17 | 2.46 $\pm$ 0.41 | 0.83 $\pm$ 0.17 | 0.89 $\pm$ 0.02 |
| UH009   | 98  | 0.815 | 82.50 $\pm$ 0.12 | 1.07 $\pm$ 0.20 | 0.96 $\pm$ 0.15 | 0.79 $\pm$ 0.04 |
| DK105   | 95  | 0.738 | 84.19 $\pm$ 0.26 | 5.86 $\pm$ 0.91 | 0.96 $\pm$ 0.19 | 0.95 $\pm$ 0.01 |
