# Supplementary material
Source: PubMed Central journal article supplement (PMC4174941)
Supplement: ba9b28f5c071209ef44dcfaf3cddcad5_genetics.114.161943-12.pdf [file ba9b28f5c071209ef44dcfaf3cddcad5_genetics.114.161943-12.pdf]

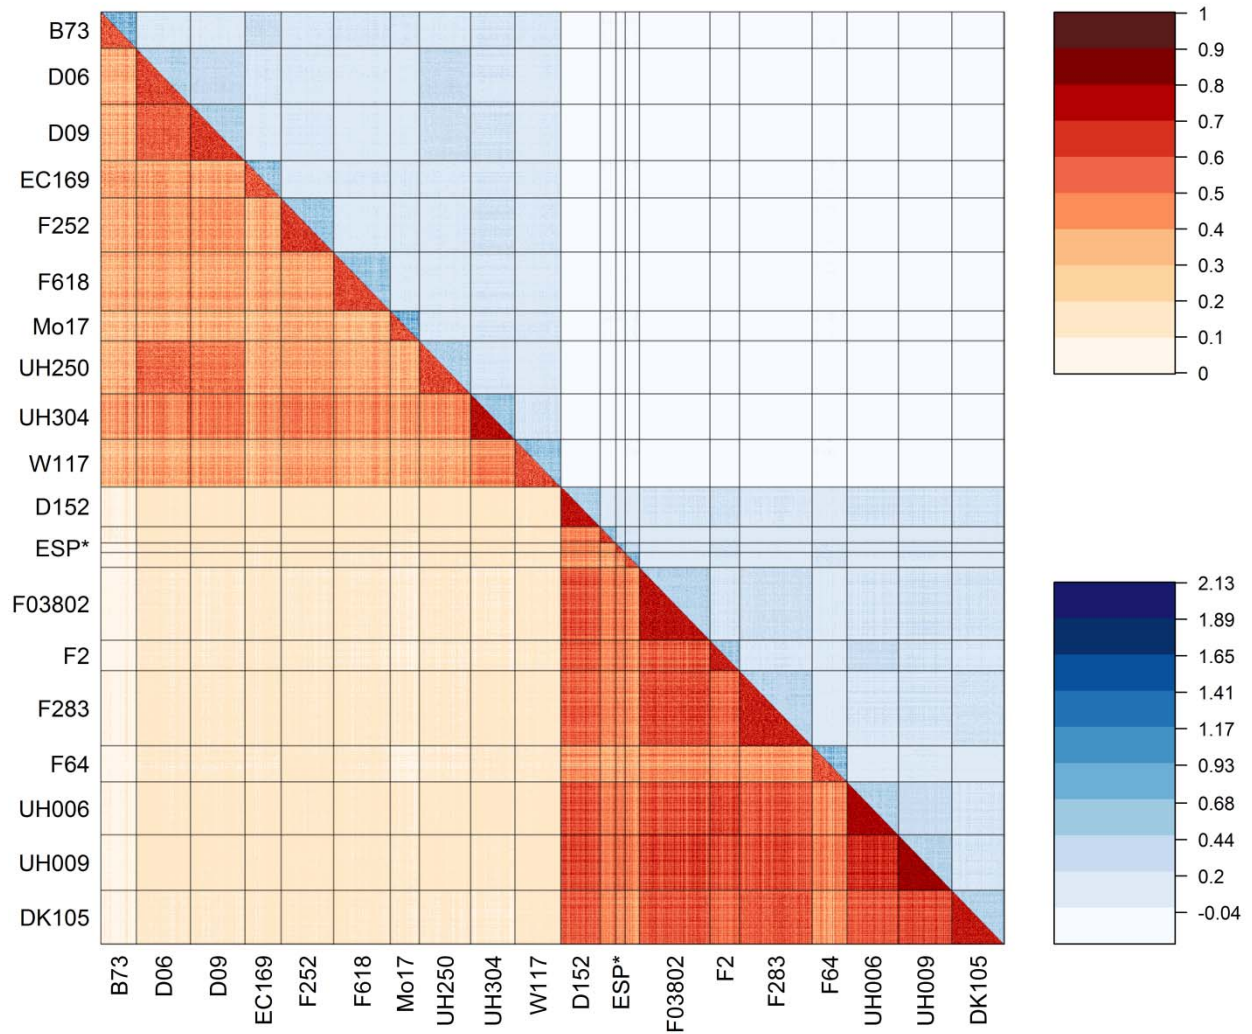

**Figure S2** Heatmap of kinship  $U$  according to Habier *et al.* (2007) (blue, upper diagonal) and of simple matching coefficient (red, lower diagonal) among DH lines. \* ESP denotes the three smallest families with Spanish origin (EC49A, EP44, EZ5). Lines separate different families.
