# Supplementary material
Source: PubMed Central journal article supplement (PMC4174941)
Supplement: d47de98f125241281ab0d49bd01aba63_genetics.114.161943-16.pdf [file d47de98f125241281ab0d49bd01aba63_genetics.114.161943-16.pdf]

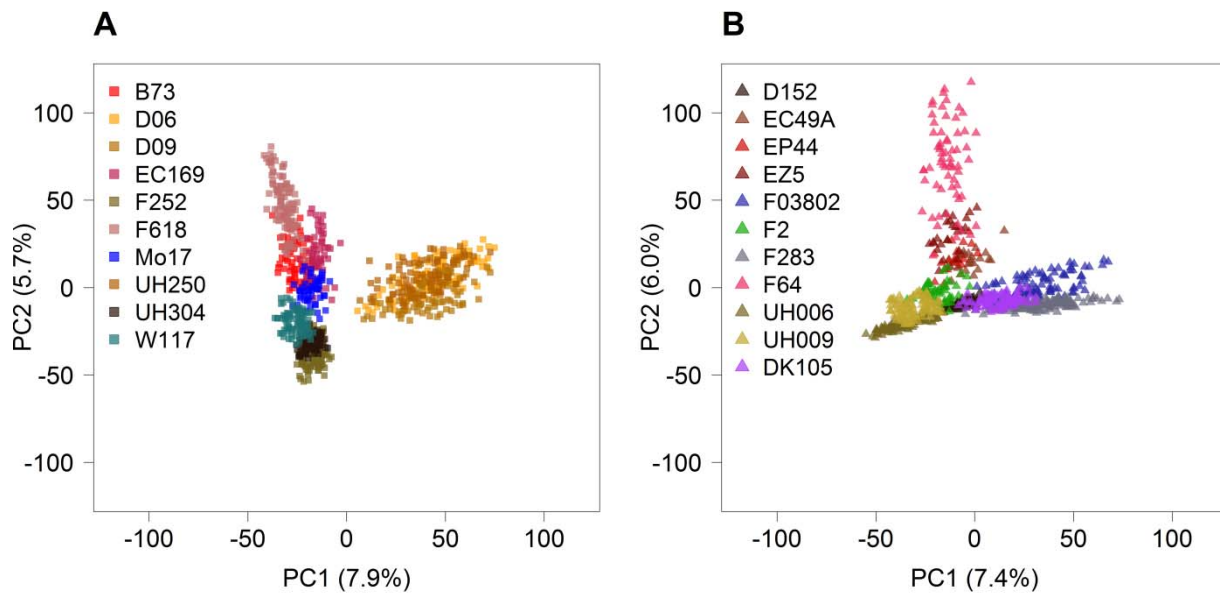

**Figure S1** Principal component analysis of dent and flint lines. First and second principal component of dent lines (A) and of flint lines (B). Colors indicate DH lines belonging to different full-sib families.

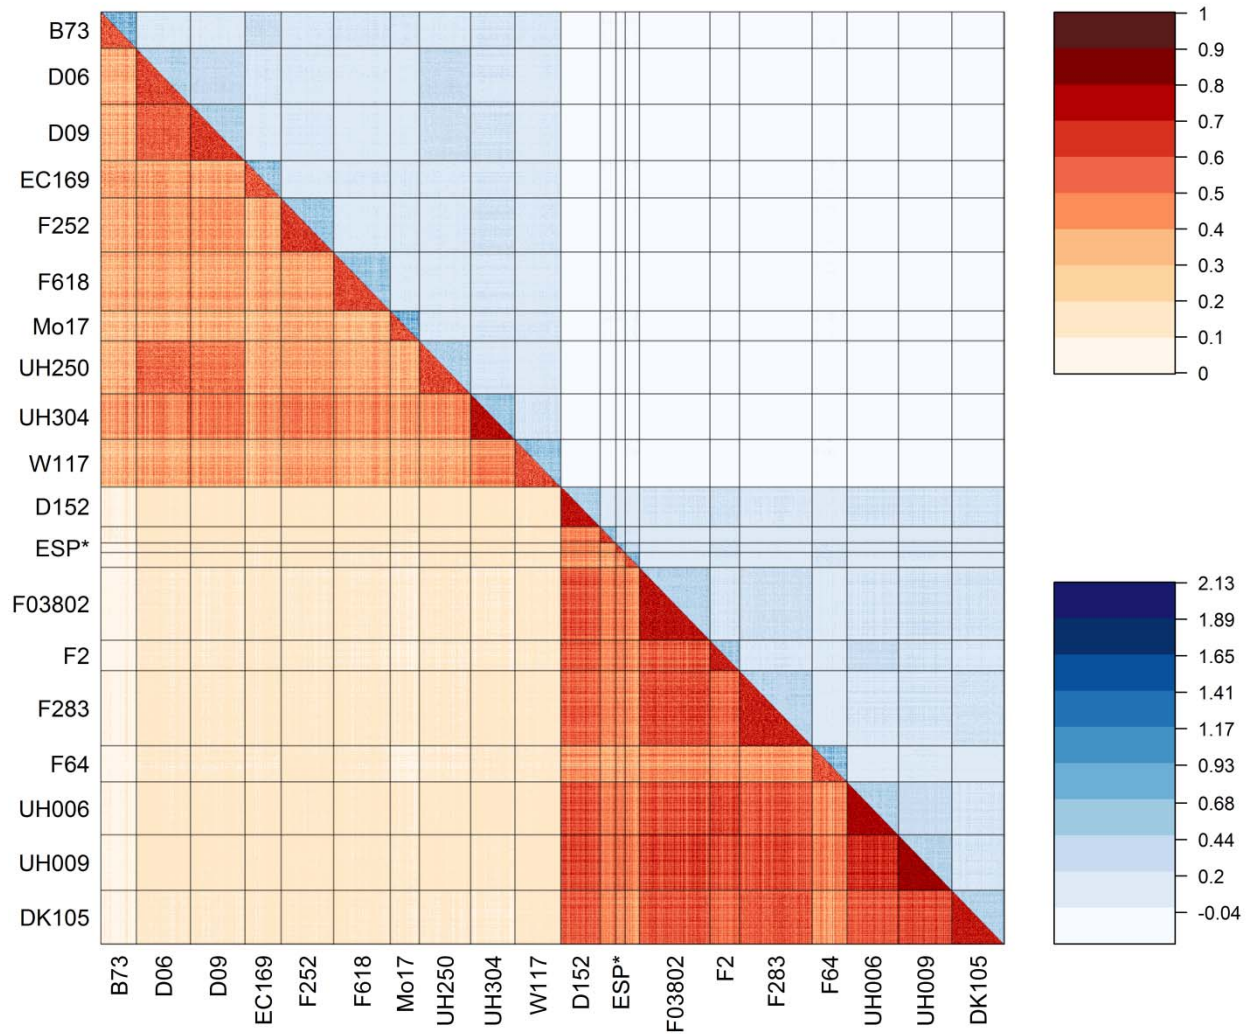

**Figure S2** Heatmap of kinship  $U$  according to Habier *et al.* (2007) (blue, upper diagonal) and of simple matching coefficient (red, lower diagonal) among DH lines. \* ESP denotes the three smallest families with Spanish origin (EC49A, EP44, EZ5). Lines separate different families.

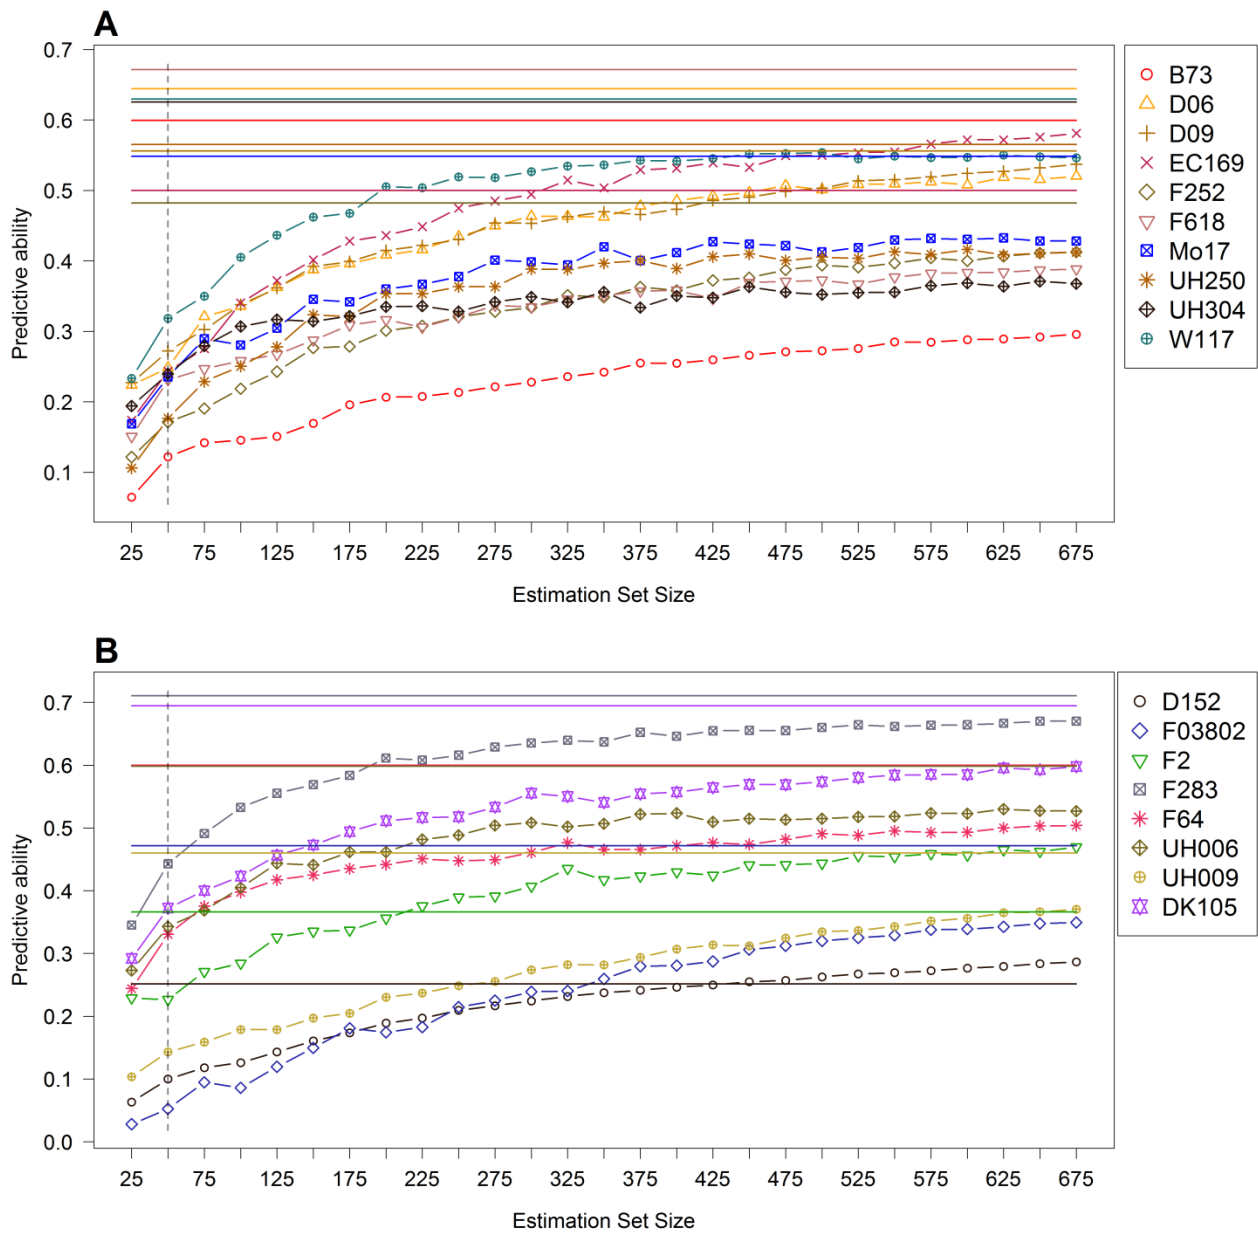

**Figure S3** Mean predictive ability of dry matter content (DMC) from LOCO-CV for increasing estimation set size. Mean predictive ability from prediction within biparental families is shown by different colored horizontal lines. A) Dent. B) Flint. The dashed vertical lines label predictive abilities at an estimation set size of 50.

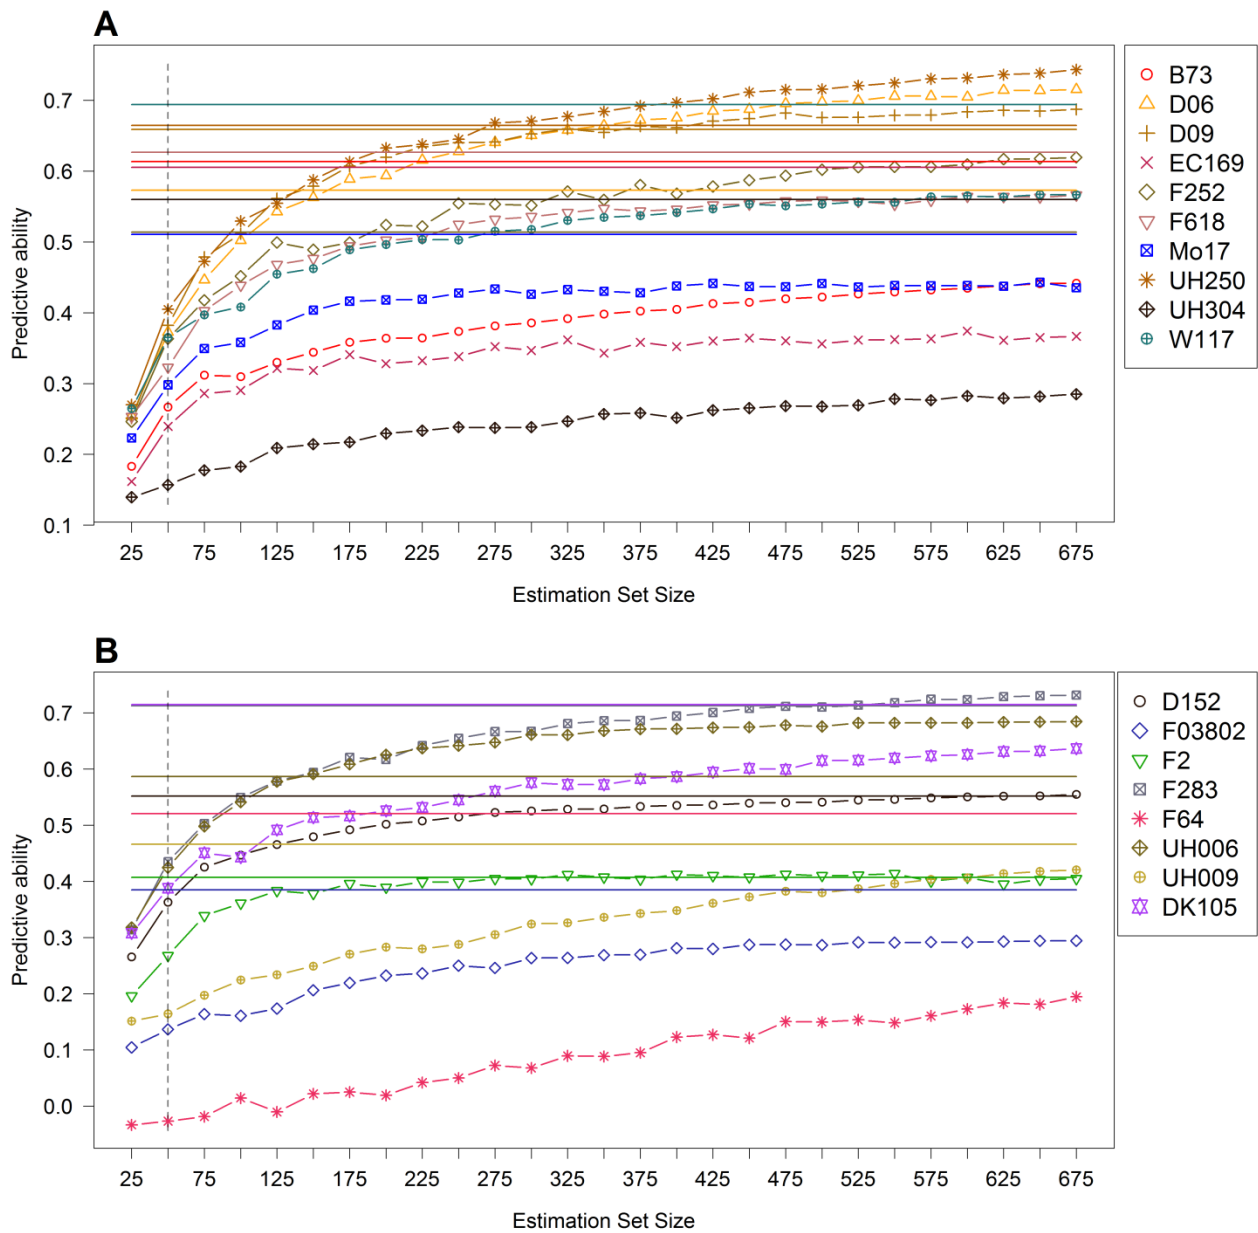

**Figure S4** Mean predictive ability of plant height (PH) from LOCO-CV for increasing estimation set size. Mean predictive ability from prediction within biparental families is shown by different colored horizontal lines. A) Dent. B) Flint. The dashed vertical lines label predictive abilities at an estimation set size of 50.

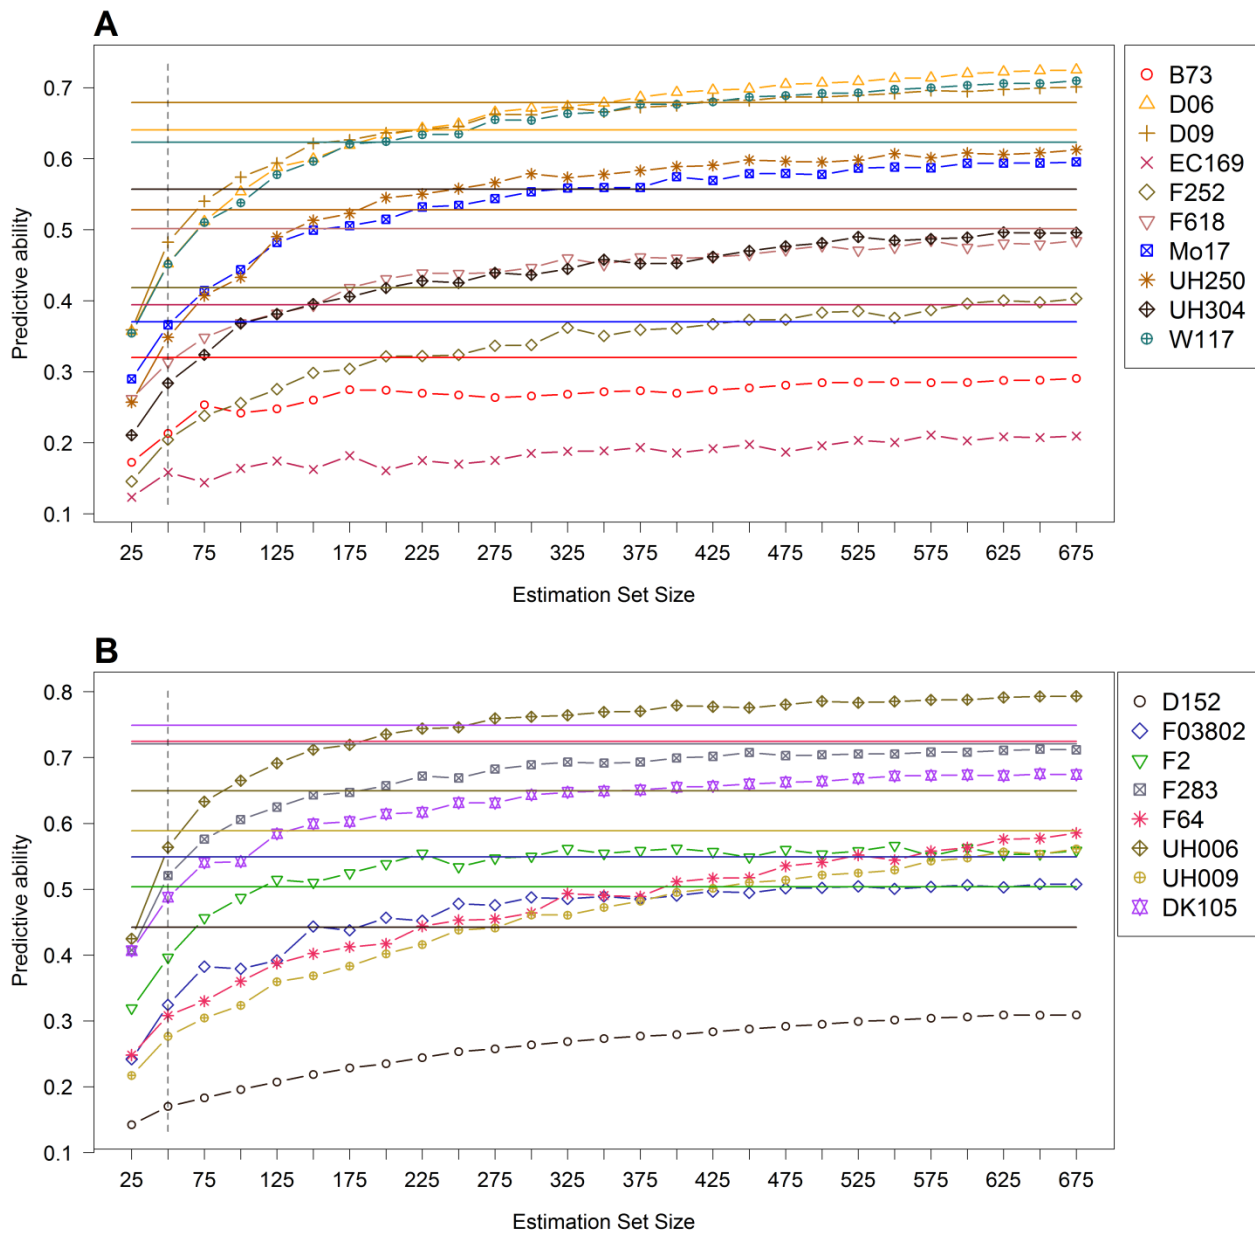

**Figure S5** Mean predictive ability of days to tasseling (DtTAS) from LOCO-CV for increasing estimation set size. Mean predictive ability from prediction within biparental families is shown by different colored horizontal lines. A) Dent. B) Flint. The dashed vertical lines label predictive abilities at an estimation set size of 50.

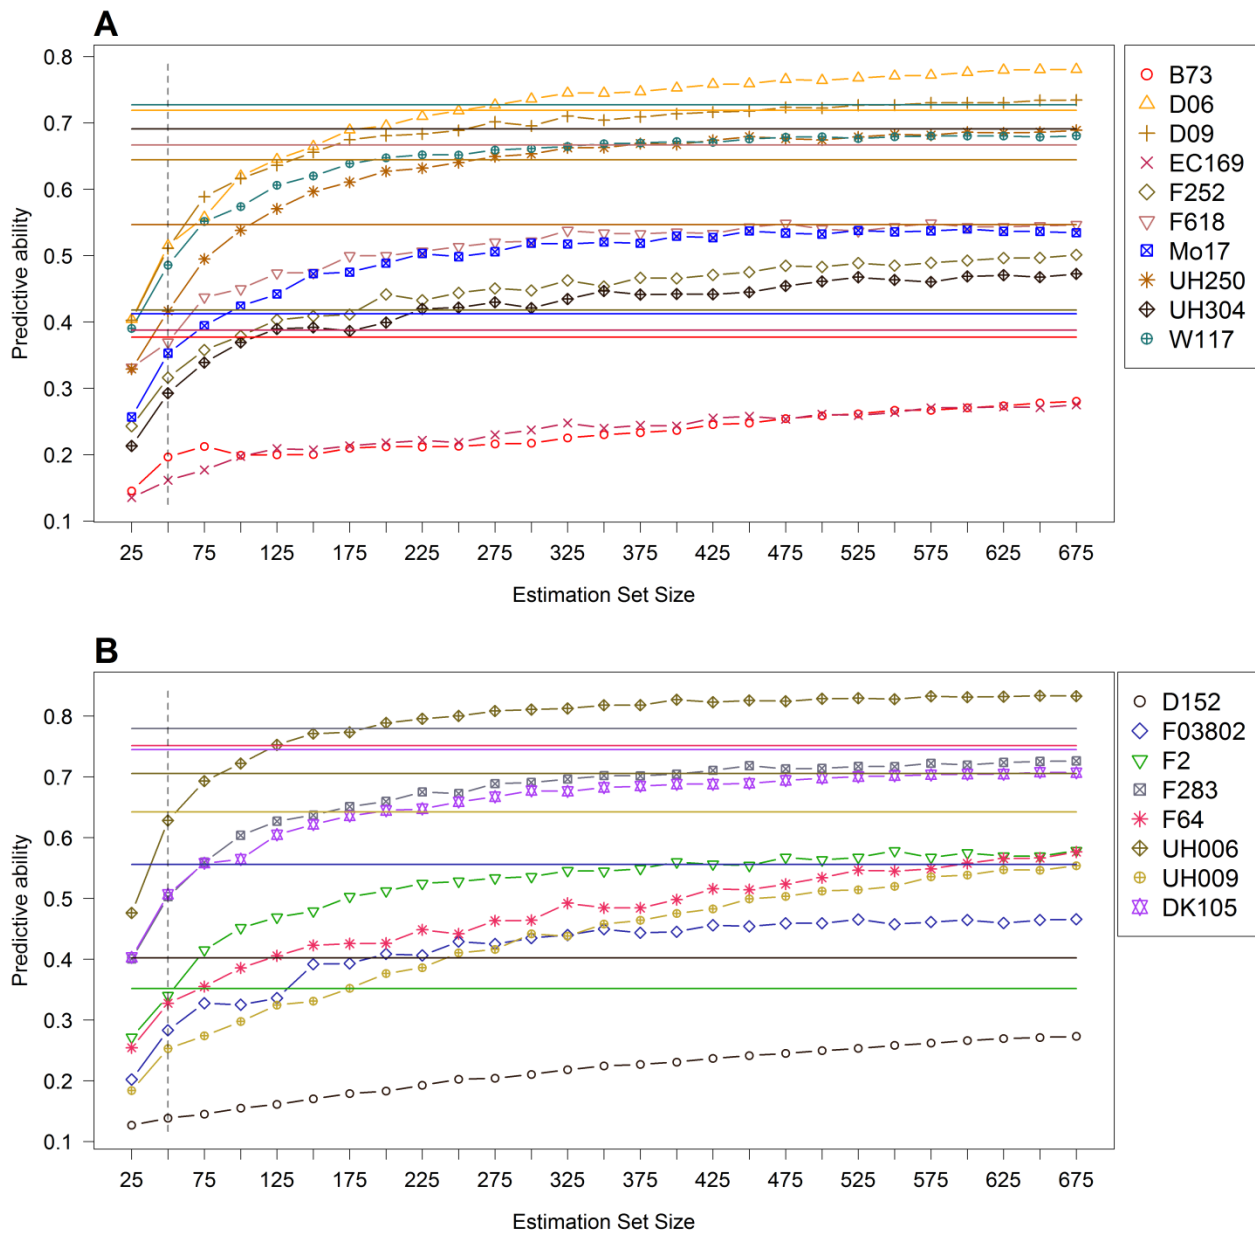

**Figure S6** Mean predictive ability of days to silking (DtSILK) from LOCO-CV for increasing estimation set size. Mean predictive ability from prediction within biparental families is shown by different colored horizontal lines. A) Dent. B) Flint. The dashed vertical lines label predictive abilities at an estimation set size of 50.

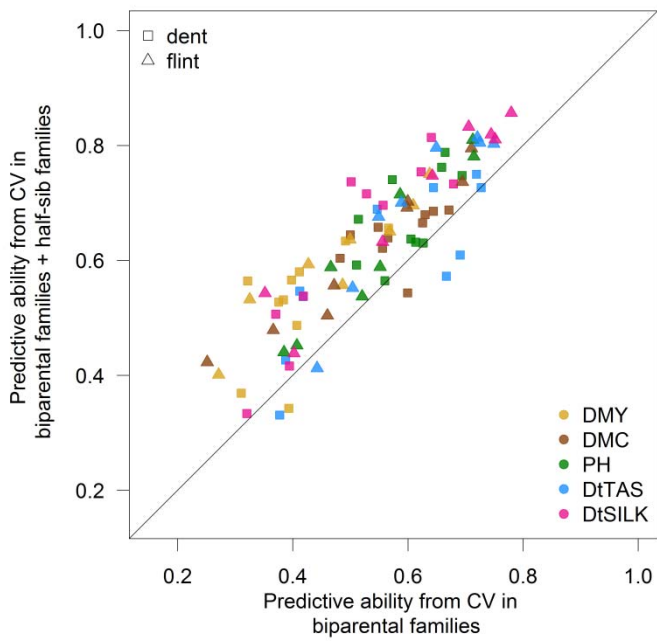

**Figure S7** Mean predictive abilities from cross-validation within biparental families (R-CV) for all five traits compared to mean predictive abilities when additionally families of the same heterotic pool (all half-sib families) were included in the estimation set. Colors indicate different traits.

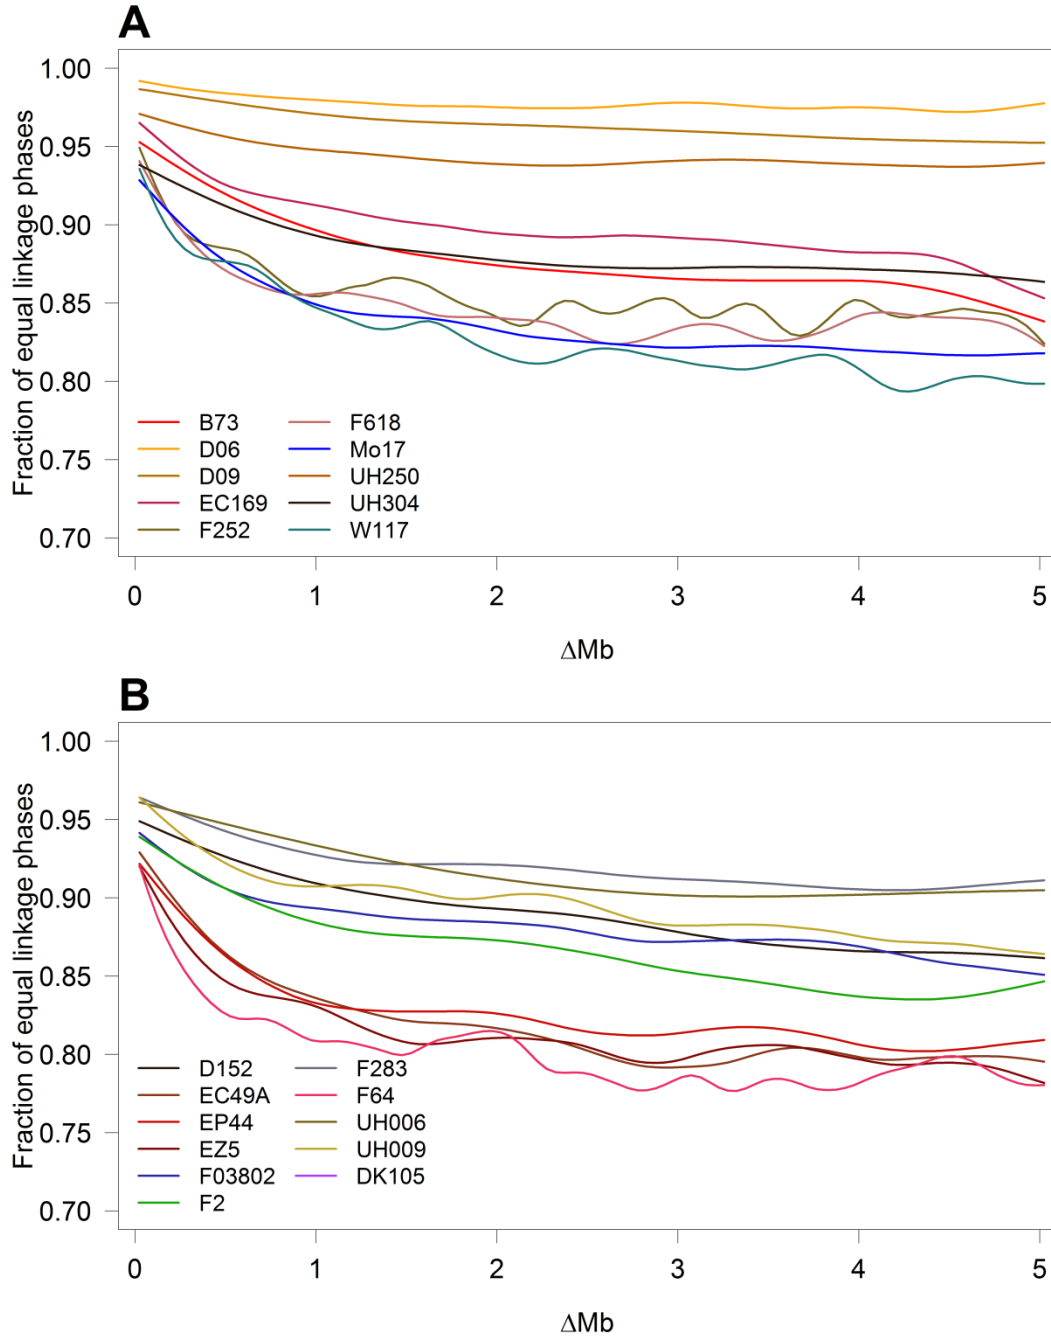

**Figure S8** Fraction of equal linkage phases according to distance between SNP pairs in mega basepairs ( $\Delta$  Mb). A: Each line shows the comparison of one dent family with the other 9 dent families. B: Each line shows the comparison of one flint family with the other 10 flint families.



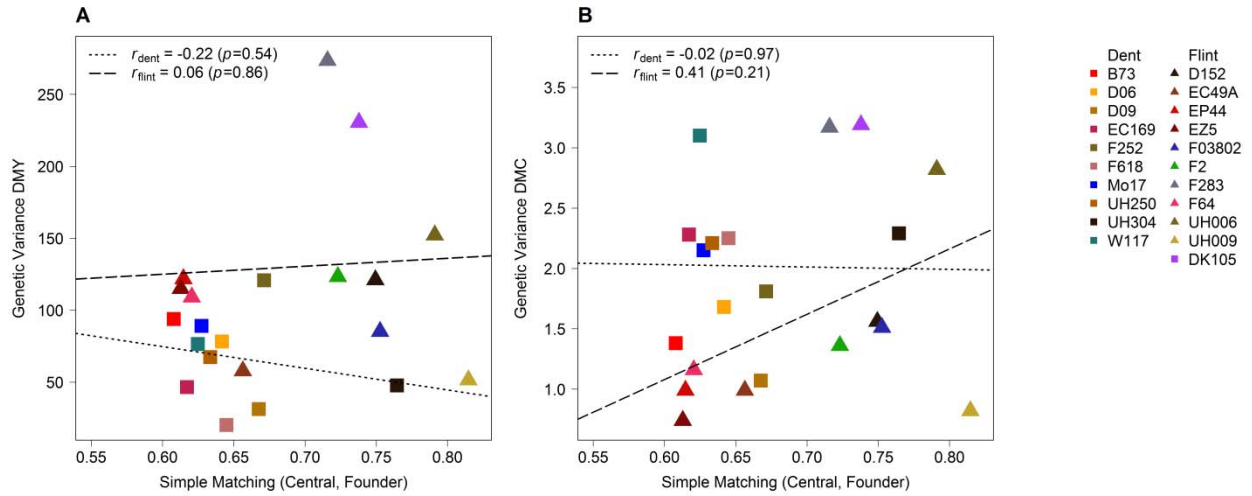

**Figure S9** Genetic variance within biparental families compared to simple matching coefficient between central and founder line. A) Dry matter yield (DMY). B) Dry matter content (DMC).

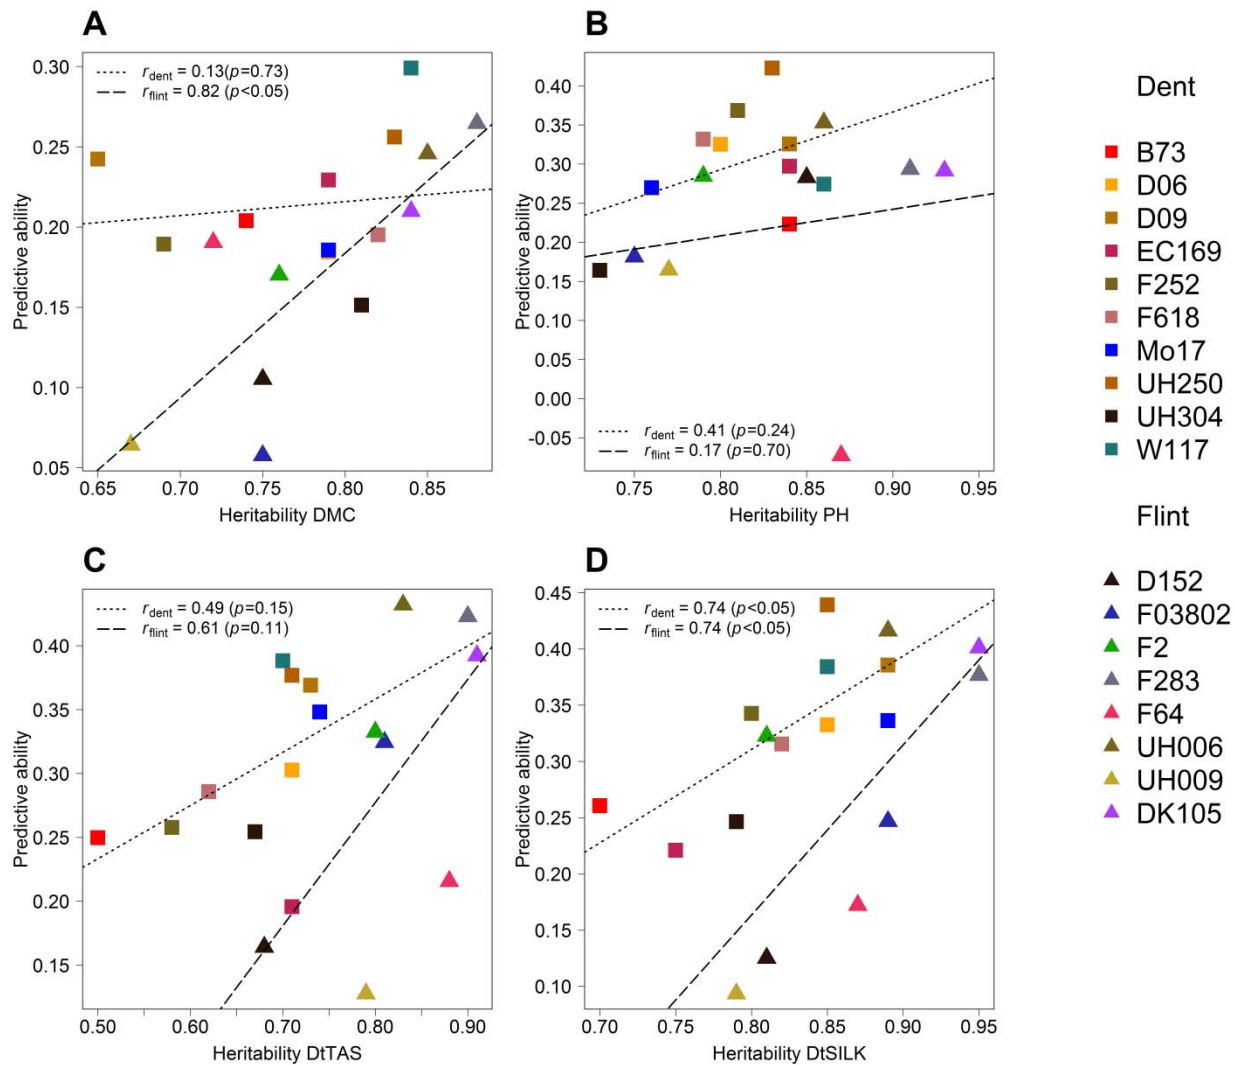

**Figure S10** Predictive ability from cross-with-cross prediction (CwC) averaged over all combinations involving the same full-sib family in the estimation set compared to the heritability of this family. Colors indicate the founder line of the family in the estimation set. A) Dry matter content (DMC). B) Plant height (PH). C) Days to tasseling (DtTAS). D) Days to silking (DtSILK).

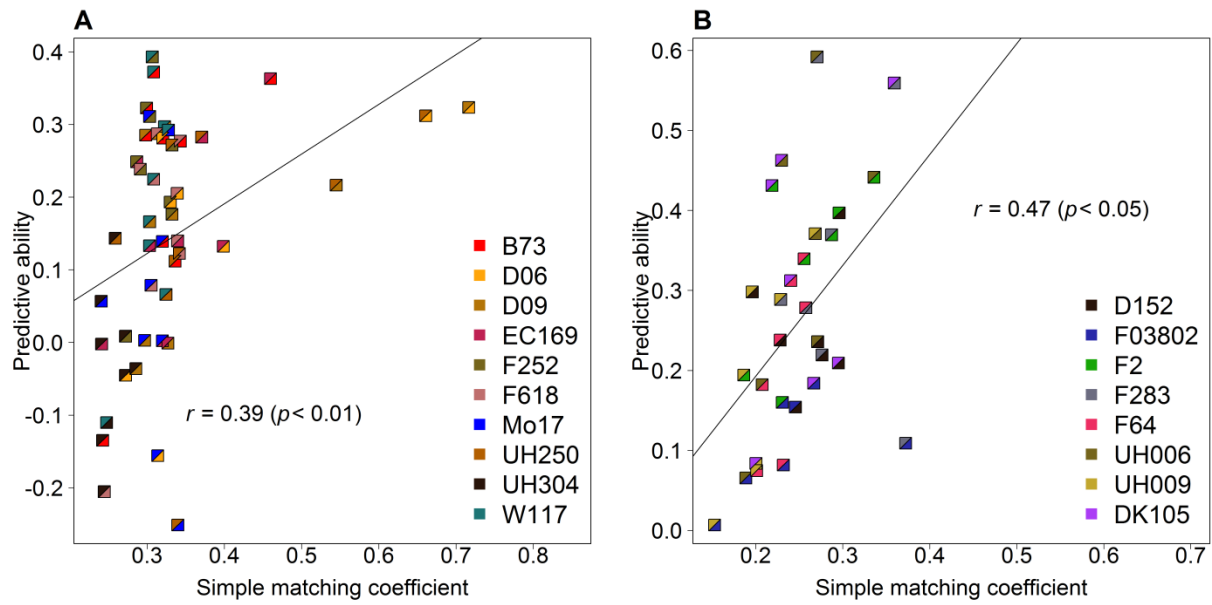

**Figure S11** Predictive ability of dry matter yield (DMY) from cross-with-cross prediction (CwC) averaged over both reciprocal estimations compared to simple matching coefficient between founder lines of crosses. Colors indicate the founder line of the family in the estimation and test set, respectively. A) Dent. B) Flint.

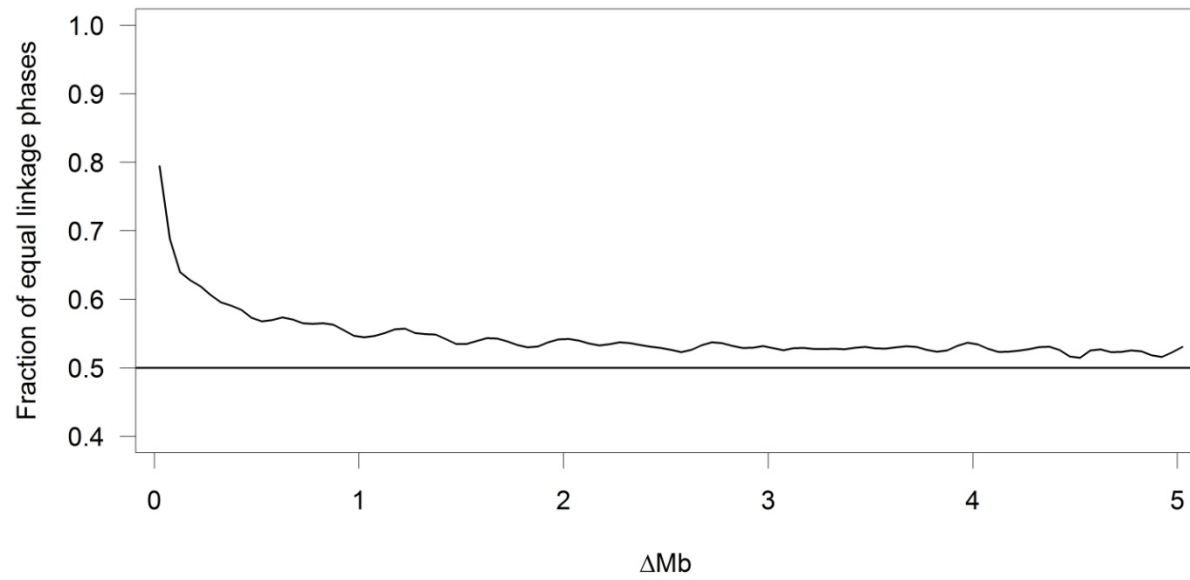

**Figure S12** Fraction of equal linkage phases among dent and flint lines according to distance between SNP pairs in mega basepairs ( $\Delta Mb$ ).

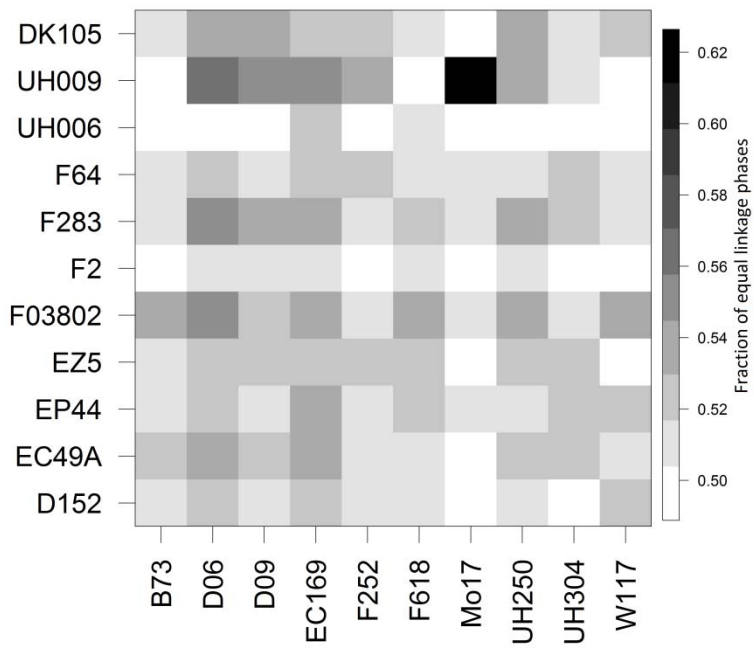

**Figure S13** Heatmap showing the fraction of equal linkage phases of 5-10 Mb distant SNP pairs among dent and flint families.

**File S1**

**Phenotypic Data**

Available for download as a .zip file at <http://www.genetics.org/lookup/suppl/doi:10.1534/genetics.114.161943/-/DC1>

**Table S1 Total number of lines (n) and simple matching coefficient (SM) between parental lines of 10 dent (F353 x founder) and 11 flint (UH007 x founder) families. Mean ( $\bar{x}$ ), genetic variance component ( $\sigma_g^2$ ), genotype by environment variance component ( $\sigma_{ge}^2$ ), and heritability ( $h^2$ ;  $\pm$  standard error) of dent and flint families estimated for plant height (PH).**

| Founder | n   | SM    | $\bar{x}$         | $\sigma_g^2$       | $\sigma_{ge}^2$   | $h^2$           |
|---------|-----|-------|-------------------|--------------------|-------------------|-----------------|
| B73     | 64  | 0.608 | 294.80 $\pm$ 1.09 | 60.66 $\pm$ 13.43  | 24.59 $\pm$ 7.66  | 0.84 $\pm$ 0.04 |
| D06     | 99  | 0.642 | 292.18 $\pm$ 0.83 | 53.05 $\pm$ 9.78   | 19.15 $\pm$ 7.08  | 0.80 $\pm$ 0.04 |
| D09     | 100 | 0.668 | 284.39 $\pm$ 0.92 | 69.51 $\pm$ 12.11  | 0                 | 0.84 $\pm$ 0.02 |
| EC169   | 66  | 0.617 | 283.51 $\pm$ 1.11 | 64.75 $\pm$ 14.05  | 8.26 $\pm$ 9.53   | 0.84 $\pm$ 0.04 |
| F252    | 96  | 0.671 | 285.70 $\pm$ 0.93 | 65.79 $\pm$ 12.17  | 22.44 $\pm$ 8.62  | 0.81 $\pm$ 0.04 |
| F618    | 104 | 0.645 | 291.36 $\pm$ 0.76 | 44.87 $\pm$ 8.37   | 5.1 $\pm$ 8.64    | 0.79 $\pm$ 0.05 |
| Mo17    | 53  | 0.627 | 292.84 $\pm$ 1.22 | 58.87 $\pm$ 15.74  | 33.17 $\pm$ 13.30 | 0.76 $\pm$ 0.06 |
| UH250   | 94  | 0.634 | 287.76 $\pm$ 0.92 | 65.53 $\pm$ 11.89  | 12.40 $\pm$ 8.32  | 0.83 $\pm$ 0.03 |
| UH304   | 81  | 0.765 | 288.50 $\pm$ 0.82 | 37.35 $\pm$ 8.5    | 20.89 $\pm$ 8.20  | 0.73 $\pm$ 0.06 |
| W117    | 84  | 0.625 | 273.78 $\pm$ 1.25 | 108.76 $\pm$ 20.47 | 24.16 $\pm$ 12.35 | 0.86 $\pm$ 0.03 |
| D152    | 72  | 0.749 | 281.09 $\pm$ 0.97 | 56.73 $\pm$ 11.41  | 5.97 $\pm$ 8.04   | 0.85 $\pm$ 0.03 |
| EC49A   | 29  | 0.656 | 288.71 $\pm$ 1.50 | 54.65 $\pm$ 17.58  | 21.96 $\pm$ 10.64 | 0.85 $\pm$ 0.05 |
| EP44    | 17  | 0.615 | 292.29 $\pm$ 2.04 | 57.65 $\pm$ 24.39  | 0                 | 0.85 $\pm$ 0.05 |
| EZ5     | 26  | 0.613 | 296.48 $\pm$ 1.48 | 42.23 $\pm$ 16.17  | 28.16 $\pm$ 14.57 | 0.77 $\pm$ 0.08 |
| F03802  | 129 | 0.753 | 292.93 $\pm$ 0.54 | 27.48 $\pm$ 4.78   | 12.75 $\pm$ 5.60  | 0.75 $\pm$ 0.04 |
| F2      | 54  | 0.723 | 285.38 $\pm$ 0.97 | 38.55 $\pm$ 9.83   | 0                 | 0.79 $\pm$ 0.04 |
| F283    | 133 | 0.716 | 288.40 $\pm$ 0.96 | 108.89 $\pm$ 14.91 | 5.46 $\pm$ 6.59   | 0.91 $\pm$ 0.01 |
| F64     | 64  | 0.621 | 299.27 $\pm$ 1.08 | 63.57 $\pm$ 13.40  | 14.97 $\pm$ 7.49  | 0.87 $\pm$ 0.03 |
| UH006   | 94  | 0.791 | 288.09 $\pm$ 0.90 | 63.96 $\pm$ 11.16  | 16.70 $\pm$ 6.86  | 0.86 $\pm$ 0.03 |
| UH009   | 98  | 0.815 | 287.88 $\pm$ 0.65 | 31.20 $\pm$ 6.07   | 7.87 $\pm$ 6.18   | 0.77 $\pm$ 0.04 |
| DK105   | 95  | 0.738 | 291.70 $\pm$ 1.17 | 118.87 $\pm$ 18.86 | 0                 | 0.93 $\pm$ 0.01 |

**Table S2 Total number of lines (n) and simple matching coefficient (SM) between parental lines of 10 dent (F353 x founder) and 11 flint (UH007 x founder) families. Mean ( $\bar{x}$ ), genetic variance component ( $\sigma_g^2$ ), genotype by environment variance component ( $\sigma_{ge}^2$ ), and heritability ( $h^2$ ;  $\pm$  standard error) of dent and flint families estimated for days to tasseling (DtTAS).**

| Founder | n   | SM    | $\bar{x}$        | $\sigma_g^2$    | $\sigma_{ge}^2$ | $h^2$           |
|---------|-----|-------|------------------|-----------------|-----------------|-----------------|
| B73     | 64  | 0.608 | 83.61 $\pm$ 0.16 | 0.78 $\pm$ 0.31 | 2.23 $\pm$ 0.39 | 0.50 $\pm$ 0.11 |
| D06     | 99  | 0.642 | 81.39 $\pm$ 0.13 | 1.07 $\pm$ 0.23 | 0.96 $\pm$ 0.2  | 0.71 $\pm$ 0.05 |
| D09     | 100 | 0.668 | 80.52 $\pm$ 0.15 | 1.54 $\pm$ 0.31 | 1.62 $\pm$ 0.24 | 0.73 $\pm$ 0.05 |
| EC169   | 66  | 0.617 | 81.66 $\pm$ 0.12 | 0.68 $\pm$ 0.18 | 0.23 $\pm$ 0.21 | 0.71 $\pm$ 0.07 |
| F252    | 96  | 0.671 | 80.12 $\pm$ 0.13 | 0.90 $\pm$ 0.24 | 2.00 $\pm$ 0.27 | 0.58 $\pm$ 0.08 |
| F618    | 104 | 0.645 | 83.81 $\pm$ 0.14 | 1.12 $\pm$ 0.27 | 1.65 $\pm$ 0.32 | 0.62 $\pm$ 0.07 |
| Mo17    | 53  | 0.627 | 84.63 $\pm$ 0.25 | 2.44 $\pm$ 0.67 | 1.45 $\pm$ 0.60 | 0.74 $\pm$ 0.07 |
| UH250   | 94  | 0.634 | 82.07 $\pm$ 0.13 | 1.12 $\pm$ 0.24 | 0.85 $\pm$ 0.25 | 0.71 $\pm$ 0.06 |
| UH304   | 81  | 0.765 | 81.70 $\pm$ 0.12 | 0.72 $\pm$ 0.18 | 0.65 $\pm$ 0.21 | 0.67 $\pm$ 0.07 |
| W117    | 84  | 0.625 | 80.69 $\pm$ 0.14 | 1.04 $\pm$ 0.25 | 0.82 $\pm$ 0.26 | 0.70 $\pm$ 0.06 |
| D152    | 72  | 0.749 | 79.63 $\pm$ 0.13 | 0.81 $\pm$ 0.21 | 1.22 $\pm$ 0.23 | 0.68 $\pm$ 0.06 |
| EC49A   | 29  | 0.656 | 82.39 $\pm$ 0.24 | 1.17 $\pm$ 0.47 | 1.89 $\pm$ 0.47 | 0.70 $\pm$ 0.09 |
| EP44    | 17  | 0.615 | 84.85 $\pm$ 0.51 | 3.74 $\pm$ 1.55 | 1.23 $\pm$ 0.79 | 0.87 $\pm$ 0.06 |
| EZ5     | 26  | 0.613 | 84.26 $\pm$ 0.41 | 3.80 $\pm$ 1.24 | 2.02 $\pm$ 0.50 | 0.88 $\pm$ 0.04 |
| F03802  | 129 | 0.753 | 81.08 $\pm$ 0.12 | 1.52 $\pm$ 0.24 | 1.16 $\pm$ 0.18 | 0.81 $\pm$ 0.03 |
| F2      | 54  | 0.723 | 79.45 $\pm$ 0.20 | 1.62 $\pm$ 0.41 | 1.37 $\pm$ 0.28 | 0.80 $\pm$ 0.05 |
| F283    | 133 | 0.716 | 81.15 $\pm$ 0.18 | 3.96 $\pm$ 0.55 | 1.14 $\pm$ 0.22 | 0.90 $\pm$ 0.01 |
| F64     | 64  | 0.621 | 84.72 $\pm$ 0.27 | 4.14 $\pm$ 0.85 | 1.30 $\pm$ 0.42 | 0.88 $\pm$ 0.03 |
| UH006   | 94  | 0.791 | 80.17 $\pm$ 0.15 | 1.79 $\pm$ 0.33 | 1.09 $\pm$ 0.22 | 0.83 $\pm$ 0.03 |
| UH009   | 98  | 0.815 | 80.10 $\pm$ 0.12 | 1.07 $\pm$ 0.20 | 0.84 $\pm$ 0.17 | 0.79 $\pm$ 0.04 |
| DK105   | 95  | 0.738 | 81.15 $\pm$ 0.23 | 4.55 $\pm$ 0.74 | 1.04 $\pm$ 0.27 | 0.91 $\pm$ 0.02 |



**Table S3 Total number of lines (n) and simple matching coefficient (SM) between parental lines of 10 dent (F353 x founder) and 11 flint (UH007 x founder) families. Mean ( $\bar{x}$ ), genetic variance component ( $\sigma_g^2$ ), genotype by environment variance component ( $\sigma_{ge}^2$ ), and heritability ( $h^2$ ;  $\pm$  standard error) of dent and flint families estimated for days to silking (DtSILK).**

| Founder | n   | SM    | $\bar{x}$        | $\sigma_g^2$    | $\sigma_{ge}^2$ | $h^2$           |
|---------|-----|-------|------------------|-----------------|-----------------|-----------------|
| B73     | 64  | 0.608 | 85.59 $\pm$ 0.20 | 1.57 $\pm$ 0.43 | 1.66 $\pm$ 0.39 | 0.70 $\pm$ 0.07 |
| D06     | 99  | 0.642 | 82.85 $\pm$ 0.18 | 2.72 $\pm$ 0.47 | 0.95 $\pm$ 0.24 | 0.85 $\pm$ 0.03 |
| D09     | 100 | 0.668 | 81.93 $\pm$ 0.21 | 3.74 $\pm$ 0.61 | 0               | 0.89 $\pm$ 0.02 |
| EC169   | 66  | 0.617 | 83.02 $\pm$ 0.14 | 0.95 $\pm$ 0.24 | 0.44 $\pm$ 0.23 | 0.75 $\pm$ 0.06 |
| F252    | 96  | 0.671 | 81.41 $\pm$ 0.18 | 2.38 $\pm$ 0.44 | 0.87 $\pm$ 0.32 | 0.80 $\pm$ 0.04 |
| F618    | 104 | 0.645 | 85.57 $\pm$ 0.19 | 2.91 $\pm$ 0.52 | 0.97 $\pm$ 0.35 | 0.82 $\pm$ 0.03 |
| Mo17    | 53  | 0.627 | 87.3 $\pm$ 0.33  | 4.93 $\pm$ 1.11 | 1.09 $\pm$ 0.43 | 0.89 $\pm$ 0.03 |
| UH250   | 94  | 0.634 | 83.54 $\pm$ 0.18 | 2.71 $\pm$ 0.48 | 1.05 $\pm$ 0.24 | 0.85 $\pm$ 0.03 |
| UH304   | 81  | 0.765 | 82.70 $\pm$ 0.16 | 1.59 $\pm$ 0.33 | 0.83 $\pm$ 0.24 | 0.79 $\pm$ 0.04 |
| W117    | 84  | 0.625 | 82.30 $\pm$ 0.23 | 3.59 $\pm$ 0.68 | 0.92 $\pm$ 0.40 | 0.85 $\pm$ 0.03 |
| D152    | 72  | 0.749 | 82.88 $\pm$ 0.15 | 1.23 $\pm$ 0.26 | 0.67 $\pm$ 0.20 | 0.81 $\pm$ 0.04 |
| EC49A   | 29  | 0.656 | 85.89 $\pm$ 0.30 | 2.21 $\pm$ 0.69 | 0.60 $\pm$ 0.38 | 0.87 $\pm$ 0.04 |
| EP44    | 17  | 0.615 | 88.41 $\pm$ 0.52 | 4.14 $\pm$ 1.66 | 1.93 $\pm$ 0.57 | 0.89 $\pm$ 0.04 |
| EZ5     | 26  | 0.613 | 88.05 $\pm$ 0.36 | 2.92 $\pm$ 0.97 | 1.69 $\pm$ 0.43 | 0.86 $\pm$ 0.04 |
| F03802  | 129 | 0.753 | 84.31 $\pm$ 0.14 | 2.12 $\pm$ 0.30 | 0.46 $\pm$ 0.15 | 0.89 $\pm$ 0.02 |
| F2      | 54  | 0.723 | 82.25 $\pm$ 0.18 | 1.39 $\pm$ 0.34 | 1.38 $\pm$ 0.21 | 0.81 $\pm$ 0.04 |
| F283    | 133 | 0.716 | 84.67 $\pm$ 0.23 | 6.46 $\pm$ 0.84 | 0.93 $\pm$ 0.17 | 0.95 $\pm$ 0.01 |
| F64     | 64  | 0.621 | 88.41 $\pm$ 0.27 | 3.91 $\pm$ 0.81 | 2.00 $\pm$ 0.36 | 0.87 $\pm$ 0.03 |
| UH006   | 94  | 0.791 | 83.16 $\pm$ 0.17 | 2.46 $\pm$ 0.41 | 0.83 $\pm$ 0.17 | 0.89 $\pm$ 0.02 |
| UH009   | 98  | 0.815 | 82.50 $\pm$ 0.12 | 1.07 $\pm$ 0.20 | 0.96 $\pm$ 0.15 | 0.79 $\pm$ 0.04 |
| DK105   | 95  | 0.738 | 84.19 $\pm$ 0.26 | 5.86 $\pm$ 0.91 | 0.96 $\pm$ 0.19 | 0.95 $\pm$ 0.01 |

**Table S4 Predictive abilities ( $\pm$  standard error from 1000 Bootstrap samples) when flint lines are in the test set and dent lines are in the estimation set, and vice versa.** Predictive ability is evaluated within each family separately.

|        | DMY                | DMC                | PH                 | DtTAS              | DtSILK             |
|--------|--------------------|--------------------|--------------------|--------------------|--------------------|
| B73    | -0.218 $\pm$ 0.101 | -0.311 $\pm$ 0.097 | -0.319 $\pm$ 0.096 | 0.006 $\pm$ 0.142  | 0.228 $\pm$ 0.148  |
| D06    | 0.118 $\pm$ 0.099  | 0.212 $\pm$ 0.091  | -0.102 $\pm$ 0.106 | -0.218 $\pm$ 0.100 | 0.030 $\pm$ 0.109  |
| D09    | 0.072 $\pm$ 0.126  | 0.072 $\pm$ 0.097  | -0.145 $\pm$ 0.089 | -0.173 $\pm$ 0.094 | -0.285 $\pm$ 0.091 |
| EC169  | -0.235 $\pm$ 0.113 | -0.008 $\pm$ 0.112 | 0.044 $\pm$ 0.132  | -0.159 $\pm$ 0.143 | -0.151 $\pm$ 0.170 |
| F252   | -0.107 $\pm$ 0.100 | 0.252 $\pm$ 0.099  | 0.138 $\pm$ 0.091  | 0.086 $\pm$ 0.100  | -0.028 $\pm$ 0.091 |
| F618   | -0.069 $\pm$ 0.100 | 0.095 $\pm$ 0.093  | 0.245 $\pm$ 0.112  | 0.230 $\pm$ 0.087  | 0.156 $\pm$ 0.088  |
| Mo17   | 0.131 $\pm$ 0.119  | -0.223 $\pm$ 0.113 | -0.202 $\pm$ 0.114 | -0.01 $\pm$ 0.169  | -0.044 $\pm$ 0.141 |
| UH250  | 0.046 $\pm$ 0.104  | 0.109 $\pm$ 0.118  | -0.343 $\pm$ 0.099 | -0.194 $\pm$ 0.088 | -0.290 $\pm$ 0.084 |
| UH304  | 0.183 $\pm$ 0.109  | 0.232 $\pm$ 0.114  | 0.308 $\pm$ 0.097  | 0.276 $\pm$ 0.106  | 0.391 $\pm$ 0.090  |
| W117   | 0.135 $\pm$ 0.104  | -0.215 $\pm$ 0.092 | -0.224 $\pm$ 0.104 | -0.048 $\pm$ 0.133 | -0.149 $\pm$ 0.123 |
| D152   | -0.409 $\pm$ 0.105 | 0.078 $\pm$ 0.109  | -0.275 $\pm$ 0.11  | -0.099 $\pm$ 0.098 | -0.057 $\pm$ 0.132 |
| EC49A  | 0.123 $\pm$ 0.179  | -0.198 $\pm$ 0.162 | 0.210 $\pm$ 0.168  | 0.149 $\pm$ 0.189  | 0.156 $\pm$ 0.153  |
| EP44   | 0.173 $\pm$ 0.260  | 0.242 $\pm$ 0.175  | 0.275 $\pm$ 0.212  | 0.273 $\pm$ 0.234  | 0.262 $\pm$ 0.225  |
| EZ5    | -0.143 $\pm$ 0.229 | 0.002 $\pm$ 0.197  | -0.040 $\pm$ 0.168 | 0.207 $\pm$ 0.145  | 0.468 $\pm$ 0.087  |
| F03802 | -0.036 $\pm$ 0.084 | -0.187 $\pm$ 0.077 | 0.059 $\pm$ 0.081  | -0.049 $\pm$ 0.072 | 0.199 $\pm$ 0.088  |
| F2     | -0.379 $\pm$ 0.095 | 0.363 $\pm$ 0.099  | -0.167 $\pm$ 0.104 | -0.316 $\pm$ 0.128 | -0.160 $\pm$ 0.114 |
| F283   | 0.053 $\pm$ 0.077  | 0.178 $\pm$ 0.084  | 0.385 $\pm$ 0.072  | 0.050 $\pm$ 0.073  | 0.066 $\pm$ 0.081  |
| F64    | 0.011 $\pm$ 0.114  | 0.009 $\pm$ 0.116  | 0.039 $\pm$ 0.114  | 0.153 $\pm$ 0.111  | 0.309 $\pm$ 0.113  |
| UH006  | -0.217 $\pm$ 0.094 | -0.174 $\pm$ 0.112 | 0.329 $\pm$ 0.094  | -0.099 $\pm$ 0.106 | -0.173 $\pm$ 0.104 |
| UH009  | -0.080 $\pm$ 0.108 | -0.028 $\pm$ 0.097 | 0.036 $\pm$ 0.096  | -0.083 $\pm$ 0.103 | -0.111 $\pm$ 0.092 |
| DK105  | -0.138 $\pm$ 0.099 | -0.024 $\pm$ 0.102 | 0.141 $\pm$ 0.104  | -0.028 $\pm$ 0.084 | 0.098 $\pm$ 0.098  |
