# Supplementary material
Source: PubMed Central journal article supplement (PMC4174941)
Supplement: e8dd77550e550a3f66aba376010c1645_genetics.114.161943-6.pdf [file e8dd77550e550a3f66aba376010c1645_genetics.114.161943-6.pdf]

**Table S1 Total number of lines (n) and simple matching coefficient (SM) between parental lines of 10 dent (F353 x founder) and 11 flint (UH007 x founder) families. Mean ( $\bar{x}$ ), genetic variance component ( $\sigma_g^2$ ), genotype by environment variance component ( $\sigma_{ge}^2$ ), and heritability ( $h^2$ ;  $\pm$  standard error) of dent and flint families estimated for plant height (PH).**

| Founder | n   | SM    | $\bar{x}$         | $\sigma_g^2$       | $\sigma_{ge}^2$   | $h^2$           |
|---------|-----|-------|-------------------|--------------------|-------------------|-----------------|
| B73     | 64  | 0.608 | 294.80 $\pm$ 1.09 | 60.66 $\pm$ 13.43  | 24.59 $\pm$ 7.66  | 0.84 $\pm$ 0.04 |
| D06     | 99  | 0.642 | 292.18 $\pm$ 0.83 | 53.05 $\pm$ 9.78   | 19.15 $\pm$ 7.08  | 0.80 $\pm$ 0.04 |
| D09     | 100 | 0.668 | 284.39 $\pm$ 0.92 | 69.51 $\pm$ 12.11  | 0                 | 0.84 $\pm$ 0.02 |
| EC169   | 66  | 0.617 | 283.51 $\pm$ 1.11 | 64.75 $\pm$ 14.05  | 8.26 $\pm$ 9.53   | 0.84 $\pm$ 0.04 |
| F252    | 96  | 0.671 | 285.70 $\pm$ 0.93 | 65.79 $\pm$ 12.17  | 22.44 $\pm$ 8.62  | 0.81 $\pm$ 0.04 |
| F618    | 104 | 0.645 | 291.36 $\pm$ 0.76 | 44.87 $\pm$ 8.37   | 5.1 $\pm$ 8.64    | 0.79 $\pm$ 0.05 |
| Mo17    | 53  | 0.627 | 292.84 $\pm$ 1.22 | 58.87 $\pm$ 15.74  | 33.17 $\pm$ 13.30 | 0.76 $\pm$ 0.06 |
| UH250   | 94  | 0.634 | 287.76 $\pm$ 0.92 | 65.53 $\pm$ 11.89  | 12.40 $\pm$ 8.32  | 0.83 $\pm$ 0.03 |
| UH304   | 81  | 0.765 | 288.50 $\pm$ 0.82 | 37.35 $\pm$ 8.5    | 20.89 $\pm$ 8.20  | 0.73 $\pm$ 0.06 |
| W117    | 84  | 0.625 | 273.78 $\pm$ 1.25 | 108.76 $\pm$ 20.47 | 24.16 $\pm$ 12.35 | 0.86 $\pm$ 0.03 |
| D152    | 72  | 0.749 | 281.09 $\pm$ 0.97 | 56.73 $\pm$ 11.41  | 5.97 $\pm$ 8.04   | 0.85 $\pm$ 0.03 |
| EC49A   | 29  | 0.656 | 288.71 $\pm$ 1.50 | 54.65 $\pm$ 17.58  | 21.96 $\pm$ 10.64 | 0.85 $\pm$ 0.05 |
| EP44    | 17  | 0.615 | 292.29 $\pm$ 2.04 | 57.65 $\pm$ 24.39  | 0                 | 0.85 $\pm$ 0.05 |
| EZ5     | 26  | 0.613 | 296.48 $\pm$ 1.48 | 42.23 $\pm$ 16.17  | 28.16 $\pm$ 14.57 | 0.77 $\pm$ 0.08 |
| F03802  | 129 | 0.753 | 292.93 $\pm$ 0.54 | 27.48 $\pm$ 4.78   | 12.75 $\pm$ 5.60  | 0.75 $\pm$ 0.04 |
| F2      | 54  | 0.723 | 285.38 $\pm$ 0.97 | 38.55 $\pm$ 9.83   | 0                 | 0.79 $\pm$ 0.04 |
| F283    | 133 | 0.716 | 288.40 $\pm$ 0.96 | 108.89 $\pm$ 14.91 | 5.46 $\pm$ 6.59   | 0.91 $\pm$ 0.01 |
| F64     | 64  | 0.621 | 299.27 $\pm$ 1.08 | 63.57 $\pm$ 13.40  | 14.97 $\pm$ 7.49  | 0.87 $\pm$ 0.03 |
| UH006   | 94  | 0.791 | 288.09 $\pm$ 0.90 | 63.96 $\pm$ 11.16  | 16.70 $\pm$ 6.86  | 0.86 $\pm$ 0.03 |
| UH009   | 98  | 0.815 | 287.88 $\pm$ 0.65 | 31.20 $\pm$ 6.07   | 7.87 $\pm$ 6.18   | 0.77 $\pm$ 0.04 |
| DK105   | 95  | 0.738 | 291.70 $\pm$ 1.17 | 118.87 $\pm$ 18.86 | 0                 | 0.93 $\pm$ 0.01 |
