# Supplementary material
Source: PubMed Central journal article supplement (PMC4174941)
Supplement: f896f822d2017ff8eaba726c202ffa19_genetics.114.161943-9.pdf [file f896f822d2017ff8eaba726c202ffa19_genetics.114.161943-9.pdf]

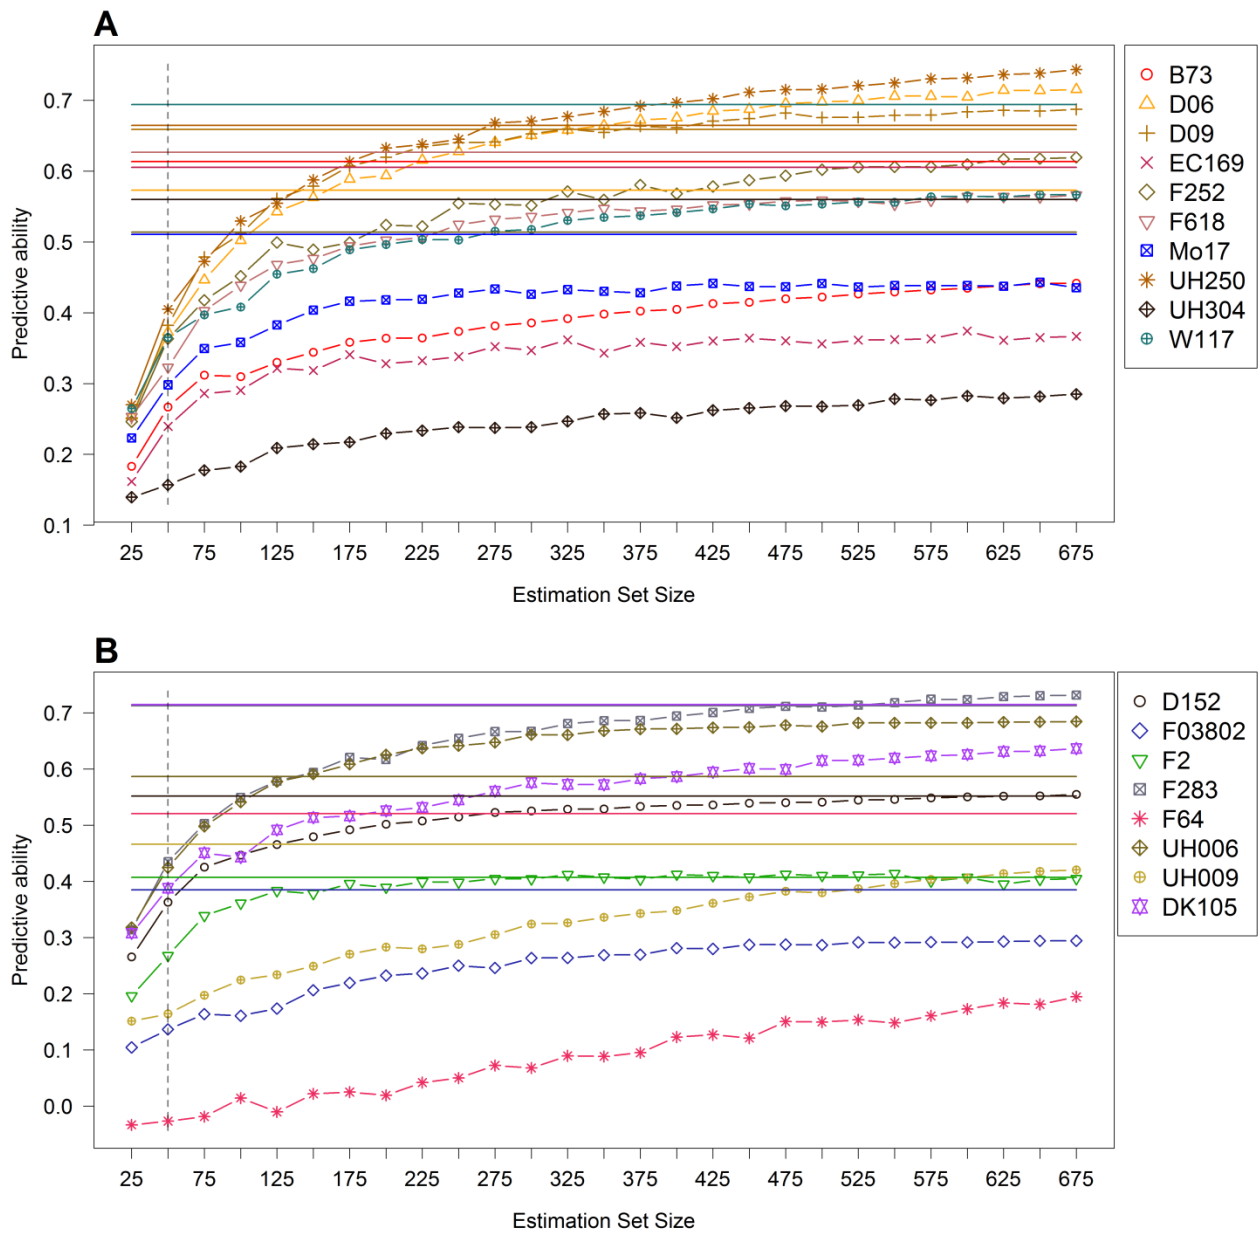

**Figure S4** Mean predictive ability of plant height (PH) from LOCO-CV for increasing estimation set size. Mean predictive ability from prediction within biparental families is shown by different colored horizontal lines. A) Dent. B) Flint. The dashed vertical lines label predictive abilities at an estimation set size of 50.
