# Supplementary material
Source: PubMed Central journal article supplement (PMC4174941)
Supplement: f095119f1e86ac1cd0c38b6e14f8e0d3_genetics.114.161943-10.pdf [file f095119f1e86ac1cd0c38b6e14f8e0d3_genetics.114.161943-10.pdf]

**Table S4 Predictive abilities ( $\pm$  standard error from 1000 Bootstrap samples) when flint lines are in the test set and dent lines are in the estimation set, and vice versa.** Predictive ability is evaluated within each family separately.

|        | DMY                | DMC                | PH                 | DtTAS              | DtSILK             |
|--------|--------------------|--------------------|--------------------|--------------------|--------------------|
| B73    | -0.218 $\pm$ 0.101 | -0.311 $\pm$ 0.097 | -0.319 $\pm$ 0.096 | 0.006 $\pm$ 0.142  | 0.228 $\pm$ 0.148  |
| D06    | 0.118 $\pm$ 0.099  | 0.212 $\pm$ 0.091  | -0.102 $\pm$ 0.106 | -0.218 $\pm$ 0.100 | 0.030 $\pm$ 0.109  |
| D09    | 0.072 $\pm$ 0.126  | 0.072 $\pm$ 0.097  | -0.145 $\pm$ 0.089 | -0.173 $\pm$ 0.094 | -0.285 $\pm$ 0.091 |
| EC169  | -0.235 $\pm$ 0.113 | -0.008 $\pm$ 0.112 | 0.044 $\pm$ 0.132  | -0.159 $\pm$ 0.143 | -0.151 $\pm$ 0.170 |
| F252   | -0.107 $\pm$ 0.100 | 0.252 $\pm$ 0.099  | 0.138 $\pm$ 0.091  | 0.086 $\pm$ 0.100  | -0.028 $\pm$ 0.091 |
| F618   | -0.069 $\pm$ 0.100 | 0.095 $\pm$ 0.093  | 0.245 $\pm$ 0.112  | 0.230 $\pm$ 0.087  | 0.156 $\pm$ 0.088  |
| Mo17   | 0.131 $\pm$ 0.119  | -0.223 $\pm$ 0.113 | -0.202 $\pm$ 0.114 | -0.01 $\pm$ 0.169  | -0.044 $\pm$ 0.141 |
| UH250  | 0.046 $\pm$ 0.104  | 0.109 $\pm$ 0.118  | -0.343 $\pm$ 0.099 | -0.194 $\pm$ 0.088 | -0.290 $\pm$ 0.084 |
| UH304  | 0.183 $\pm$ 0.109  | 0.232 $\pm$ 0.114  | 0.308 $\pm$ 0.097  | 0.276 $\pm$ 0.106  | 0.391 $\pm$ 0.090  |
| W117   | 0.135 $\pm$ 0.104  | -0.215 $\pm$ 0.092 | -0.224 $\pm$ 0.104 | -0.048 $\pm$ 0.133 | -0.149 $\pm$ 0.123 |
| D152   | -0.409 $\pm$ 0.105 | 0.078 $\pm$ 0.109  | -0.275 $\pm$ 0.11  | -0.099 $\pm$ 0.098 | -0.057 $\pm$ 0.132 |
| EC49A  | 0.123 $\pm$ 0.179  | -0.198 $\pm$ 0.162 | 0.210 $\pm$ 0.168  | 0.149 $\pm$ 0.189  | 0.156 $\pm$ 0.153  |
| EP44   | 0.173 $\pm$ 0.260  | 0.242 $\pm$ 0.175  | 0.275 $\pm$ 0.212  | 0.273 $\pm$ 0.234  | 0.262 $\pm$ 0.225  |
| EZ5    | -0.143 $\pm$ 0.229 | 0.002 $\pm$ 0.197  | -0.040 $\pm$ 0.168 | 0.207 $\pm$ 0.145  | 0.468 $\pm$ 0.087  |
| F03802 | -0.036 $\pm$ 0.084 | -0.187 $\pm$ 0.077 | 0.059 $\pm$ 0.081  | -0.049 $\pm$ 0.072 | 0.199 $\pm$ 0.088  |
| F2     | -0.379 $\pm$ 0.095 | 0.363 $\pm$ 0.099  | -0.167 $\pm$ 0.104 | -0.316 $\pm$ 0.128 | -0.160 $\pm$ 0.114 |
| F283   | 0.053 $\pm$ 0.077  | 0.178 $\pm$ 0.084  | 0.385 $\pm$ 0.072  | 0.050 $\pm$ 0.073  | 0.066 $\pm$ 0.081  |
| F64    | 0.011 $\pm$ 0.114  | 0.009 $\pm$ 0.116  | 0.039 $\pm$ 0.114  | 0.153 $\pm$ 0.111  | 0.309 $\pm$ 0.113  |
| UH006  | -0.217 $\pm$ 0.094 | -0.174 $\pm$ 0.112 | 0.329 $\pm$ 0.094  | -0.099 $\pm$ 0.106 | -0.173 $\pm$ 0.104 |
| UH009  | -0.080 $\pm$ 0.108 | -0.028 $\pm$ 0.097 | 0.036 $\pm$ 0.096  | -0.083 $\pm$ 0.103 | -0.111 $\pm$ 0.092 |
| DK105  | -0.138 $\pm$ 0.099 | -0.024 $\pm$ 0.102 | 0.141 $\pm$ 0.104  | -0.028 $\pm$ 0.084 | 0.098 $\pm$ 0.098  |
