# Supplementary material
Source: PubMed Central journal article supplement (PMC4174941)
Supplement: fe86b72789a9d19e64c8e590e80350ae_genetics.114.161943-4.pdf [file fe86b72789a9d19e64c8e590e80350ae_genetics.114.161943-4.pdf]

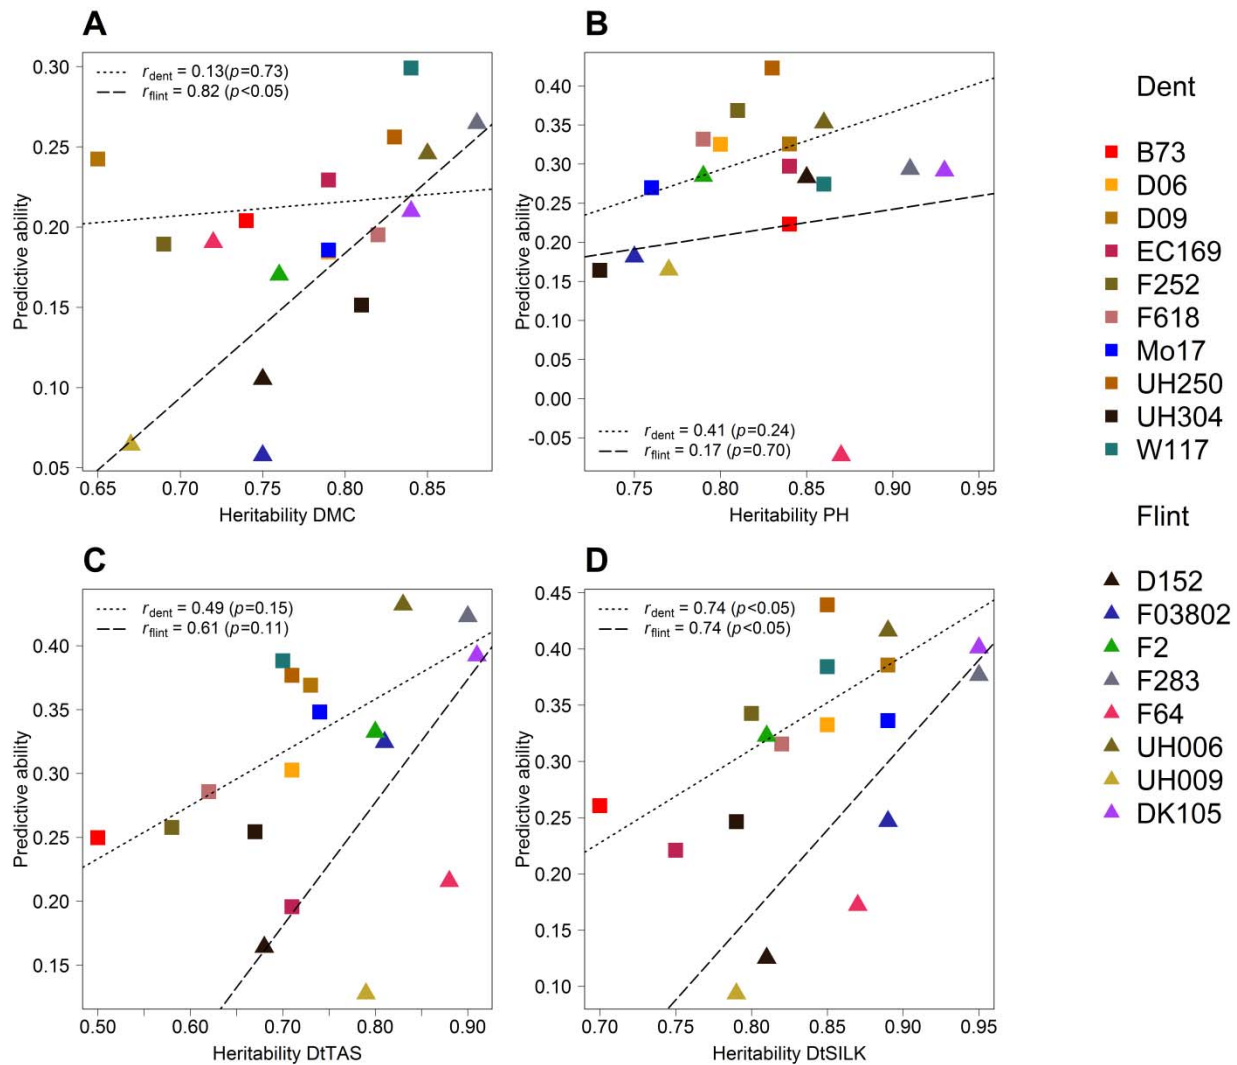

**Figure S10** Predictive ability from cross-with-cross prediction (CwC) averaged over all combinations involving the same full-sib family in the estimation set compared to the heritability of this family. Colors indicate the founder line of the family in the estimation set. A) Dry matter content (DMC). B) Plant height (PH). C) Days to tasseling (DtTAS). D) Days to silking (DtSILK).
